# Supplementary material for: Effect of Drought and Low P on Yield and Nutritional Content in Common Bean
Source: Front Plant Sci. 2022 Mar 29;13:814325. doi: 10.3389/fpls.2022.814325 (PMC9002355; doi:10.3389/fpls.2022.814325)
Supplement: Supplementary file 2 [file Data_Sheet_1.XLSX]

## Sheet: SupTable1
Supplementary Table 1. Pearson's correlation and P value between different yield trait parameters
r	HI	PHI	PN	SN	SW
AbvB	0.906336	0.734784	0.975068	0.962791	0.992419
HI		0.837025	0.874525	0.907645	0.937942
PHI			0.695352	0.73008	0.759568
PN				0.968409	0.960982
SN					0.958737
P	HI	PHI	PN	SN	SW
AbvB	0	2.75464e-09	0	0	0
HI		1.24345e-13	4.44089e-16	0	0
PHI			4.14123e-08	3.90068e-09	3.87598e-10
PN				0	0
SN					0

## Sheet: SupTable2
Supplementary Table 2. Treatment comparisons between different yield parameters
	Aboveground biomass (AbvB) g		Harvest Index (HI)		Percent Harvest Index (PHI)		Pod Number (PN)		Seed Number (SN)		Seed Weight (SW) g
Treatments	Difference	P value	Difference	P value	Difference	P value	Difference	P value	Difference	P value	Difference	P value
HPWD - HPWW	-32.1199	0	-0.255977	0	-6.9762	0	-17.835	0	-80.7696	0	-17.4996	0
HPWD - LPWD	1.3092	0.5142	-0.0264315	0.3252	4.19254	0.0014	0.273618	0.9786	1.08645	0.9716	0.243292	0.9776
HPWD - LPWW	-23.7065	0	-0.28441	0	-7.24812	0	-13.5294	0	-69.9085	0	-14.1029	0
HPWW - LPWD	33.4291	0	0.229545	0	11.1687	0	18.1086	0	81.8561	0	17.7429	0
HPWW - LPWW	8.41339	0	-0.028433	0.233	-0.271913	0.9941	4.30556	0	10.8611	0.0001	3.39668	0
LPWD - LPWW	-25.0157	0	-0.257978	0	-11.4407	0	-13.803	0	-70.9949	0	-14.3462	0
Means of yield parameters adjusted for lines and treatments
HSD test at ɑ = 0.05. Italicised P values are not significant

## Sheet: SupTable3
Supplementary Table 3. Multiple comparison between different lines for different yield parameters. DOR390 and Tio Canela75 are commercial checks
Line Comparisons	Harvest Index					Pod Harvest Index					Pod Number					Seed Weight (g)					Seed Number
	Difference	Pvalue	signif.	LCL	UCL	Difference	Pvalue	signif.	LCL	UCL	Difference	Pvalue	signif.	LCL	UCL	Difference	Pvalue	signif.	LCL	UCL	Difference	Pvalue	signif.	LCL	UCL
BFS35 - BFS81	0.0459348	0.8258		-0.0407676	0.132637	4.39924	0.4208		-1.76548	10.564	-0.166667	1		-4.02654	3.69321	1.65004	0.8519		-1.53141	4.83149	2.5	1		-11.3752	16.3752
BFS35 - CARIOCA	0.0869545	0.0597	.	-0.00169662	0.175606	9.20458	0.0003	***	2.90131	15.5078	-0.719697	1		-4.66632	3.22693	1.37592	0.9597		-1.87703	4.62887	-8.88636	0.6232		-23.0734	5.30069
BFS35 - DOR390	0.0745353	0.1892		-0.0141157	0.163186	3.99793	0.6047		-2.30534	10.3012	-1.26515	0.995		-5.21178	2.68148	2.83191	0.1538		-0.421041	6.08486	-13.5227	0.0765	.	-27.7098	0.664325
BFS35 - NCB226	0.0115803	1		-0.0751222	0.0982827	0.804836	1		-5.35988	6.96955	-2.58333	0.5223		-6.44321	1.27654	-0.2581	1		-3.43955	2.92335	-1.83333	1		-15.7085	12.0419
BFS35 - RCB593	0.0613249	0.4348		-0.0253776	0.148027	5.05391	0.2196		-1.11081	11.2186	2.41667	0.6238		-1.44321	6.27654	1.60635	0.8729		-1.5751	4.7878	8.25	0.6957		-5.62521	22.1252
BFS35 - SEF60	0.0106662	1		-0.0760363	0.0973686	3.83689	0.6324		-2.32782	10.0016	1.41667	0.9849		-2.44321	5.27654	1.29127	0.9701		-1.89017	4.47272	1.41667	1		-12.4585	15.2919
BFS35 - SEF71	0.0673388	0.2923		-0.0193637	0.154041	4.0785	0.5404		-2.08622	10.2432	2.33333	0.6735		-1.52654	6.19321	2.74386	0.1638		-0.437591	5.9253	11.4167	0.2151		-2.45854	25.2919
BFS35 - SEF73	0.0776062	0.1458		-0.0110448	0.166257	6.82188	0.0223	*	0.518616	13.1252	-2.26515	0.7404		-6.21178	1.68148	1.4095	0.9522		-1.84345	4.66245	1.11364	1		-13.0734	15.3007
BFS35 - SEN56	0.053542	0.6437		-0.0331605	0.140244	5.85409	0.0789	.	-0.310628	12.0188	2	0.8455		-1.85988	5.85988	1.53176	0.9045		-1.64969	4.71321	2.33333	1		-11.5419	16.2085
BFS35 - SXB412	0.0266376	0.9977		-0.0642967	0.117572	6.5826	0.0421	*	0.116991	13.0482	-2.58333	0.5956		-6.63161	1.46494	0.234518	1		-3.10221	3.57125	-12.35	0.1786		-26.9024	2.20244
BFS35 - TIOCANELA75	0.0732532	0.1836		-0.0134493	0.159956	6.08968	0.056	.	-0.0750352	12.2544	-0.666667	1		-4.52654	3.19321	2.21301	0.4702		-0.968439	5.39446	-7.75	0.7719		-21.6252	6.12521
BFS81 - CARIOCA	0.0410196	0.9212		-0.0476315	0.129671	4.80534	0.3193		-1.49793	11.1086	-0.55303	1		-4.49966	3.3936	-0.274124	1		-3.52707	2.97882	-11.3864	0.247		-25.5734	2.80069
BFS81 - DOR390	0.0286005	0.9948		-0.0600506	0.117252	-0.401316	1		-6.70458	5.90195	-1.09848	0.9986		-5.04511	2.84814	1.18187	0.9872		-2.07108	4.43482	-16.0227	0.0136	*	-30.2098	-1.83568
BFS81 - NCB226	-0.0343546	0.973		-0.121057	0.0523479	-3.59441	0.7209		-9.75913	2.57031	-2.41667	0.6238		-6.27654	1.44321	-1.90814	0.6938		-5.08959	1.27331	-4.33333	0.996		-18.2085	9.54188
BFS81 - RCB593	0.0153901	1		-0.0713124	0.102093	0.654663	1		-5.51006	6.81938	2.58333	0.5223		-1.27654	6.44321	-0.0436917	1		-3.22514	3.13776	5.75	0.9626		-8.12521	19.6252
BFS81 - SEF60	-0.0352687	0.9673		-0.121971	0.0514338	-0.562349	1		-6.72707	5.60237	1.58333	0.9652		-2.27654	5.44321	-0.358767	1		-3.54021	2.82268	-1.08333	1		-14.9585	12.7919
BFS81 - SEF71	0.0214039	0.9995		-0.0652985	0.108106	-0.320747	1		-6.48547	5.84397	2.5	0.5731		-1.35988	6.35988	1.09381	0.9918		-2.08763	4.27526	8.91667	0.585		-4.95854	22.7919
BFS81 - SEF73	0.0316714	0.9878		-0.0569797	0.120322	2.42264	0.9785		-3.88063	8.72591	-2.09848	0.8224		-6.04511	1.84814	-0.240542	1		-3.49349	3.01241	-1.38636	1		-15.5734	12.8007
BFS81 - SEN56	0.00760715	1		-0.0790953	0.0943096	1.45485	0.9997		-4.70987	7.61957	2.16667	0.7663		-1.69321	6.02654	-0.118283	1		-3.29973	3.06316	-0.166667	1		-14.0419	13.7085
BFS81 - SXB412	-0.0192973	0.9999		-0.110232	0.071637	2.18336	0.9923		-4.28225	8.64897	-2.41667	0.6904		-6.46494	1.63161	-1.41552	0.9588		-4.75225	1.92121	-14.85	0.0412	*	-29.4024	-0.297556
BFS81 - TIOCANELA75	0.0273183	0.9957		-0.0593841	0.114021	1.69044	0.9987		-4.47428	7.85516	-0.5	1		-4.35988	3.35988	0.562967	1		-2.61848	3.74441	-10.25	0.3668		-24.1252	3.62521
CARIOCA - DOR390	-0.0124191	1		-0.102977	0.0781387	-5.20665	0.2372		-11.6455	1.23219	-0.545455	1		-4.57697	3.48606	1.45599	0.9484		-1.86692	4.7789	-4.63636	0.9951		-19.1285	9.85582
CARIOCA - NCB226	-0.0753742	0.1765		-0.164025	0.0132769	-8.39974	0.0013	**	-14.703	-2.09648	-1.86364	0.9104		-5.81026	2.08299	-1.63402	0.8767		-4.88697	1.61893	7.05303	0.8778		-7.13402	21.2401
CARIOCA - RCB593	-0.0256296	0.998		-0.114281	0.0630215	-4.15067	0.5476		-10.4539	2.15259	3.13636	0.2603		-0.810264	7.08299	0.230433	1		-3.02252	3.48338	17.1364	0.0057	**	2.94931	31.3234
CARIOCA - SEF60	-0.0762883	0.1634		-0.164939	0.0123628	-5.36769	0.1747		-11.671	0.935583	2.13636	0.805		-1.81026	6.08299	-0.0846424	1		-3.33759	3.16831	10.303	0.3933		-3.88402	24.4901
CARIOCA - SEF71	-0.0196157	0.9998		-0.108267	0.0690354	-5.12608	0.2298		-11.4294	1.17719	3.05303	0.298		-0.893598	6.99966	1.36794	0.9613		-1.88501	4.62089	20.303	0.0004	***	6.11598	34.4901
CARIOCA - SEF73	-0.00934821	1		-0.099906	0.0812096	-2.3827	0.9839		-8.82153	4.05614	-1.54545	0.9789		-5.57697	2.48606	0.0335818	1		-3.28933	3.35649	10	0.474		-4.49218	24.4922
CARIOCA - SEN56	-0.0334125	0.9815		-0.122064	0.0552386	-3.35049	0.8227		-9.65376	2.95278	2.7197	0.4761		-1.22693	6.66632	0.155841	1		-3.09711	3.40879	11.2197	0.267		-2.96736	25.4067
CARIOCA - SXB412	-0.0603169	0.5677		-0.153111	0.0324772	-2.62198	0.9724		-9.21982	3.97587	-1.86364	0.9331		-5.99471	2.26743	-1.1414	0.9934		-4.54637	2.26357	-3.46364	0.9997		-18.3137	11.3864
CARIOCA - TIOCANELA75	-0.0137013	1		-0.102352	0.0749498	-3.1149	0.882		-9.41817	3.18837	0.0530303	1		-3.8936	3.99966	0.837091	0.9994		-2.41586	4.09004	1.13636	1		-13.0507	15.3234
DOR390 - NCB226	-0.0629551	0.4285		-0.151606	0.025696	-3.19309	0.8639		-9.49636	3.11018	-1.31818	0.993		-5.26481	2.62845	-3.09001	0.0794	.	-6.34296	0.162941	11.6894	0.2134		-2.49766	25.8764
DOR390 - RCB593	-0.0132104	1		-0.101862	0.0754406	1.05598	1		-5.24729	7.35925	3.68182	0.0912	.	-0.26481	7.62845	-1.22556	0.983		-4.47851	2.02739	21.7727	0.0001	***	7.58568	35.9598
DOR390 - SEF60	-0.0638692	0.4058		-0.15252	0.0247819	-0.161034	1		-6.4643	6.14224	2.68182	0.4984		-1.26481	6.62845	-1.54063	0.9138		-4.79358	1.71232	14.9394	0.03	*	0.752342	29.1264
DOR390 - SEF71	-0.00719656	1		-0.0958476	0.0814545	0.080569	1		-6.2227	6.38384	3.59848	0.1089		-0.348143	7.54511	-0.0880525	1		-3.341	3.1649	24.9394	0	***	10.7523	39.1264
DOR390 - SEF73	0.0030709	1		-0.0874869	0.0936287	2.82396	0.9445		-3.61488	9.2628	-1	0.9995		-5.03151	3.03151	-1.42241	0.9561		-4.74532	1.9005	14.6364	0.0455	*	0.144179	29.1285
DOR390 - SEN56	-0.0209934	0.9997		-0.109644	0.0676577	1.85616	0.9976		-4.44711	8.15943	3.26515	0.2083		-0.681476	7.21178	-1.30015	0.9733		-4.5531	1.9528	15.8561	0.0154	*	1.66901	30.0431
DOR390 - SXB412	-0.0478978	0.8487		-0.140692	0.0448963	2.58468	0.9752		-4.01317	9.18252	-1.31818	0.9952		-5.44925	2.81289	-2.59739	0.325		-6.00236	0.807583	1.17273	1		-13.6773	16.0228
DOR390 - TIOCANELA75	-0.00128217	1		-0.0899332	0.0873689	2.09176	0.9933		-4.21151	8.39502	0.598485	1		-3.34814	4.54511	-0.6189	1		-3.87185	2.63405	5.77273	0.9672		-8.41432	19.9598
NCB226 - RCB593	0.0497446	0.7408		-0.0369578	0.136447	4.24907	0.4758		-1.91565	10.4138	5	0.002	**	1.14012	8.85988	1.86445	0.7239		-1.317	5.0459	10.0833	0.3922		-3.79188	23.9585
NCB226 - SEF60	-0.000914104	1		-0.0876166	0.0857883	3.03206	0.8853		-3.13266	9.19678	4	0.0353	*	0.140122	7.85988	1.54937	0.8975		-1.63207	4.73082	3.25	0.9997		-10.6252	17.1252
NCB226 - SEF71	0.0557585	0.5839		-0.0309439	0.142461	3.27366	0.8236		-2.89106	9.43838	4.91667	0.0026	**	1.05679	8.77654	3.00196	0.0839	.	-0.179491	6.1834	13.25	0.0753	.	-0.625211	27.1252
NCB226 - SEF73	0.066026	0.3543		-0.0226251	0.154677	6.01705	0.0755	.	-0.28622	12.3203	0.318182	1		-3.62845	4.26481	1.6676	0.8613		-1.58535	4.92055	2.94697	0.9999		-11.2401	17.134
NCB226 - SEN56	0.0419617	0.8958		-0.0447407	0.128664	5.04925	0.2208		-1.11546	11.214	4.58333	0.0072	**	0.723455	8.44321	1.78986	0.7726		-1.39159	4.97131	4.16667	0.9972		-9.70854	18.0419
NCB226 - SXB412	0.0150573	1		-0.075877	0.105992	5.77777	0.1263		-0.687844	12.2434	0	1		-4.04827	4.04827	0.492618	1		-2.84411	3.82935	-10.5167	0.401		-25.0691	4.03578
NCB226 - TIOCANELA75	0.0616729	0.4259		-0.0250295	0.148375	5.28485	0.1675		-0.879871	11.4496	1.91667	0.8787		-1.94321	5.77654	2.47111	0.2982		-0.710339	5.65256	-5.91667	0.9543		-19.7919	7.95854
RCB593 - SEF60	-0.0506588	0.7183		-0.137361	0.0360437	-1.21701	0.9999		-7.38173	4.94771	-1	0.9993		-4.85988	2.85988	-0.315075	1		-3.49652	2.86637	-6.83333	0.8844		-20.7085	7.04188
RCB593 - SEF71	0.00601388	1		-0.0806886	0.0927163	-0.975409	1		-7.14013	5.18931	-0.0833333	1		-3.94321	3.77654	1.13751	0.9888		-2.04394	4.31895	3.16667	0.9998		-10.7085	17.0419
RCB593 - SEF73	0.0162813	1		-0.0723697	0.104932	1.76798	0.9985		-4.53529	8.07125	-4.68182	0.0073	**	-8.62845	-0.73519	-0.196851	1		-3.4498	3.0561	-7.13636	0.8692		-21.3234	7.05069
RCB593 - SEN56	-0.00778291	1		-0.0944854	0.0789195	0.800184	1		-5.36453	6.9649	-0.416667	1		-4.27654	3.44321	-0.0745917	1		-3.25604	3.10686	-5.91667	0.9543		-19.7919	7.95854
RCB593 - SXB412	-0.0346873	0.9797		-0.125622	0.0562469	1.5287	0.9997		-4.93691	7.99431	-5	0.0042	**	-9.04827	-0.951726	-1.37183	0.9671		-4.70856	1.9649	-20.6	0.0005	***	-35.1524	-6.04756
RCB593 - TIOCANELA75	0.0119283	1		-0.0747742	0.0986307	1.03578	1		-5.12894	7.2005	-3.08333	0.2533		-6.94321	0.776545	0.606658	1		-2.57479	3.78811	-16	0.0105	*	-29.8752	-2.12479
SEF60 - SEF71	0.0566726	0.5591		-0.0300298	0.143375	0.241603	1		-5.92312	6.40632	0.916667	0.9997		-2.94321	4.77654	1.45258	0.932		-1.72887	4.63403	10	0.4052		-3.87521	23.8752
SEF60 - SEF73	0.0669401	0.3336		-0.021711	0.155591	2.98499	0.9088		-3.31828	9.28826	-3.68182	0.0912	.	-7.62845	0.26481	0.118224	1		-3.13472	3.37117	-0.30303	1		-14.4901	13.884
SEF60 - SEN56	0.0428758	0.8815		-0.0438266	0.129578	2.0172	0.9941		-4.14752	8.18191	0.583333	1		-3.27654	4.44321	0.240483	1		-2.94096	3.42193	0.916667	1		-12.9585	14.7919
SEF60 - SXB412	0.0159714	1		-0.0749629	0.106906	2.74571	0.9555		-3.7199	9.21132	-4	0.0559	.	-8.04827	0.0482745	-1.05676	0.9959		-4.39349	2.27997	-13.7667	0.0814	.	-28.3191	0.785777
SEF60 - TIOCANELA75	0.062587	0.4027		-0.0241154	0.149289	2.25279	0.9854		-3.91193	8.41751	-2.08333	0.8079		-5.94321	1.77654	0.921733	0.9981		-2.25971	4.10318	-9.16667	0.5426		-23.0419	4.70854
SEF71 - SEF73	0.0102675	1		-0.0783836	0.0989185	2.74339	0.9473		-3.55988	9.04666	-4.59848	0.0092	**	-8.54511	-0.651857	-1.33436	0.9677		-4.58731	1.91859	-10.303	0.3933		-24.4901	3.88402
SEF71 - SEN56	-0.0137968	1		-0.100499	0.0729057	1.77559	0.998		-4.38913	7.94031	-0.333333	1		-4.19321	3.52654	-1.2121	0.9814		-4.39354	1.96935	-9.08333	0.5567		-22.9585	4.79188
SEF71 - SXB412	-0.0407012	0.9365		-0.131636	0.0502331	2.50411	0.9772		-3.96151	8.96972	-4.91667	0.0053	**	-8.96494	-0.868392	-2.50934	0.3466		-5.84607	0.827392	-23.7667	0	***	-38.3191	-9.21422
SEF71 - TIOCANELA75	0.00591439	1		-0.0807881	0.0926169	2.01119	0.9942		-4.15353	8.17591	-3	0.2913		-6.85988	0.859878	-0.530848	1		-3.71229	2.6506	-19.1667	0.0007	***	-33.0419	-5.29146
SEF73 - SEN56	-0.0240642	0.9989		-0.112715	0.0645868	-0.967794	1		-7.27106	5.33547	4.26515	0.0227	*	0.318524	8.21178	0.122259	1		-3.13069	3.37521	1.2197	1		-12.9674	15.4067
SEF73 - SXB412	-0.0509687	0.79		-0.143763	0.0418254	-0.239282	1		-6.83713	6.35856	-0.318182	1		-4.44925	3.81289	-1.17498	0.9916		-4.57995	2.22999	-13.4636	0.1136		-28.3137	1.38643
SEF73 - TIOCANELA75	-0.00435306	1		-0.0930041	0.084298	-0.732201	1		-7.03547	5.57107	1.59848	0.9683		-2.34814	5.54511	0.803509	0.9996		-2.44944	4.05646	-8.86364	0.6269		-23.0507	5.32342
SEN56 - SXB412	-0.0269044	0.9975		-0.117839	0.0640299	0.728513	1		-5.7371	7.19412	-4.58333	0.0132	*	-8.63161	-0.535059	-1.29724	0.9783		-4.63397	2.03949	-14.6833	0.0459	*	-29.2358	-0.13089
SEN56 - TIOCANELA75	0.0197112	0.9998		-0.0669913	0.106414	0.235593	1		-5.92913	6.40031	-2.66667	0.4721		-6.52654	1.19321	0.68125	0.9999		-2.5002	3.8627	-10.0833	0.3922		-23.9585	3.79188
SXB412 - TIOCANELA75	0.0466156	0.8544		-0.0443187	0.13755	-0.492919	1		-6.95853	5.97269	1.91667	0.9089		-2.13161	5.96494	1.97849	0.7089		-1.35824	5.31522	4.6	0.9956		-9.95244	19.1524
Yield parameters are presented where lines found to be statistically different
Means adjusted for lines and treatments
HSD test at ɑ = 0.05

## Sheet: SupTable4
Supplementary Table 4. Multiple comparison between different treatment and stage for stomatal conductance and maximum photosynthesis
Treatment.Stage Comparison	ambGS					Amax
	Difference	Pvalue	signif.	LCL	UCL	Difference	Pvalue	signif.	LCL	UCL
HPWD.Flowering - HPWD.MidPodFill	0.038713	0.9979		-0.140943	0.218369	8.0326	0	***	4.65527	11.4099
HPWD.Flowering - HPWW.Flowering	-0.34025	0	***	-0.514542	-0.165958	-5.23289	0	***	-8.48176	-1.98402
HPWD.Flowering - HPWW.MidPodFill	-0.438347	0	***	-0.615183	-0.26151	-6.12384	0	***	-9.39583	-2.85184
HPWD.Flowering - LPWD.Flowering	-0.0597293	0.9666		-0.234021	0.114563	1.27624	0.9313		-1.97263	4.52511
HPWD.Flowering - LPWD.MidPodFill	0.040294	0.9973		-0.139362	0.21995	11.3356	0	***	8.03932	14.6319
HPWD.Flowering - LPWW.Flowering	-0.512552	0	***	-0.686844	-0.33826	-6.7696	0	***	-10.0185	-3.52073
HPWD.Flowering - LPWW.MidPodFill	-0.534531	0	***	-0.708823	-0.360238	-3.59872	0.0215	*	-6.89502	-0.302414
HPWD.MidPodFill - HPWW.Flowering	-0.378963	0	***	-0.558619	-0.199307	-13.2655	0	***	-16.6428	-9.88816
HPWD.MidPodFill - HPWW.MidPodFill	-0.47706	0	***	-0.659186	-0.294934	-14.1564	0	***	-17.556	-10.7569
HPWD.MidPodFill - LPWD.Flowering	-0.0984423	0.7038		-0.278099	0.0812139	-6.75636	0	***	-10.1337	-3.37903
HPWD.MidPodFill - LPWD.MidPodFill	0.00158098	1		-0.183284	0.186446	3.30302	0.0673	.	-0.119961	6.72601
HPWD.MidPodFill - LPWW.Flowering	-0.551265	0	***	-0.730921	-0.371609	-14.8022	0	***	-18.1795	-11.4249
HPWD.MidPodFill - LPWW.MidPodFill	-0.573244	0	***	-0.7529	-0.393587	-11.6313	0	***	-15.0543	-8.20833
HPWW.Flowering - HPWW.MidPodFill	-0.0980969	0.6904		-0.274934	0.0787397	-0.890948	0.9911		-4.16294	2.38105
HPWW.Flowering - LPWD.Flowering	0.28052	0	***	0.106228	0.454813	6.50913	0	***	3.26026	9.758
HPWW.Flowering - LPWD.MidPodFill	0.380544	0	***	0.200888	0.5602	16.5685	0	***	13.2722	19.8648
HPWW.Flowering - LPWW.Flowering	-0.172302	0.0552	.	-0.346595	0.00198967	-1.53671	0.8351		-4.78558	1.71217
HPWW.Flowering - LPWW.MidPodFill	-0.194281	0.0172	*	-0.368573	-0.0199886	1.63417	0.7989		-1.66213	4.93048
HPWW.MidPodFill - LPWD.Flowering	0.378617	0	***	0.201781	0.555454	7.40008	0	***	4.12808	10.6721
HPWW.MidPodFill - LPWD.MidPodFill	0.478641	0	***	0.296515	0.660767	17.4595	0	***	14.1404	20.7786
HPWW.MidPodFill - LPWW.Flowering	-0.0742055	0.9047		-0.251042	0.102631	-0.645757	0.9988		-3.91775	2.62624
HPWW.MidPodFill - LPWW.MidPodFill	-0.0961838	0.7116		-0.273021	0.0806528	2.52512	0.2841		-0.793972	5.84422
LPWD.Flowering - LPWD.MidPodFill	0.100023	0.6864		-0.0796329	0.27968	10.0594	0	***	6.76308	13.3557
LPWD.Flowering - LPWW.Flowering	-0.452823	0	***	-0.627115	-0.278531	-8.04584	0	***	-11.2947	-4.79697
LPWD.Flowering - LPWW.MidPodFill	-0.474801	0	***	-0.649093	-0.300509	-4.87496	0.0003	***	-8.17126	-1.57865
LPWD.MidPodFill - LPWW.Flowering	-0.552846	0	***	-0.732502	-0.37319	-18.1052	0	***	-21.4015	-14.8089
LPWD.MidPodFill - LPWW.MidPodFill	-0.574825	0	***	-0.754481	-0.395168	-14.9343	0	***	-18.2774	-11.5913
LPWW.Flowering - LPWW.MidPodFill	-0.0219783	0.9999		-0.19627	0.152314	3.17088	0.069	.	-0.125421	6.46718
Treatment and stage are combined as a single factor. Means adjusted for lines and treatments.stage combinations
HSD test at ɑ = 0.05

## Sheet: SupTable5
Supplementary Table 5. Multiple comparison between different treatment and stage for carbon isotope abundance
Treatment.Stage Comparison	Difference	Pvalue	signif.	LCL	UCL
Flowering.HPWD - Flowering.HPWW	0.83088	0.0001	***	0.266949	1.39481
Flowering.HPWD - Flowering.LPWD	0.285731	0.8719		-0.270085	0.841547
Flowering.HPWD - Flowering.LPWW	1.3613	0	***	0.805483	1.91712
Flowering.HPWD - Harvest.HPWD	-5.08979	0	***	-5.6581	-4.52149
Flowering.HPWD - Harvest.HPWW	-1.56026	0	***	-2.11608	-1.00444
Flowering.HPWD - Harvest.LPWD	-3.64986	0	***	-4.22278	-3.07693
Flowering.HPWD - Harvest.LPWW	-0.741983	0.0009	***	-1.2978	-0.186167
Flowering.HPWD - Mid Pod Fill.HPWD	-0.497437	0.153		-1.06575	0.070871
Flowering.HPWD - Mid Pod Fill.HPWW	0.14226	0.9996		-0.417512	0.702033
Flowering.HPWD - Mid Pod Fill.LPWD	-0.264815	0.9273		-0.828746	0.299116
Flowering.HPWD - Mid Pod Fill.LPWW	0.775393	0.0004	***	0.21562	1.33517
Flowering.HPWW - Flowering.LPWD	-0.545149	0.069	.	-1.10908	0.0187817
Flowering.HPWW - Flowering.LPWW	0.530419	0.0878	.	-0.0335119	1.09435
Flowering.HPWW - Harvest.HPWD	-5.92067	0	***	-6.49692	-5.34443
Flowering.HPWW - Harvest.HPWW	-2.39114	0	***	-2.95507	-1.82721
Flowering.HPWW - Harvest.LPWD	-4.48074	0	***	-5.06153	-3.89994
Flowering.HPWW - Harvest.LPWW	-1.57286	0	***	-2.13679	-1.00893
Flowering.HPWW - Mid Pod Fill.HPWD	-1.32832	0	***	-1.90456	-0.752071
Flowering.HPWW - Mid Pod Fill.HPWW	-0.68862	0.0045	**	-1.25645	-0.12079
Flowering.HPWW - Mid Pod Fill.LPWD	-1.0957	0	***	-1.66763	-0.523765
Flowering.HPWW - Mid Pod Fill.LPWW	-0.0554874	1		-0.623318	0.512343
Flowering.LPWD - Flowering.LPWW	1.07557	0	***	0.519752	1.63138
Flowering.LPWD - Harvest.HPWD	-5.37553	0	***	-5.94383	-4.80722
Flowering.LPWD - Harvest.HPWW	-1.84599	0	***	-2.40181	-1.29017
Flowering.LPWD - Harvest.LPWD	-3.93559	0	***	-4.50851	-3.36266
Flowering.LPWD - Harvest.LPWW	-1.02771	0	***	-1.58353	-0.471898
Flowering.LPWD - Mid Pod Fill.HPWD	-0.783168	0.0005	***	-1.35148	-0.21486
Flowering.LPWD - Mid Pod Fill.HPWW	-0.143471	0.9995		-0.703243	0.416302
Flowering.LPWD - Mid Pod Fill.LPWD	-0.550546	0.063	.	-1.11448	0.0133851
Flowering.LPWD - Mid Pod Fill.LPWW	0.489662	0.1537		-0.0701105	1.04943
Flowering.LPWW - Harvest.HPWD	-6.45109	0	***	-7.0194	-5.88279
Flowering.LPWW - Harvest.HPWW	-2.92156	0	***	-3.47738	-2.36574
Flowering.LPWW - Harvest.LPWD	-5.01116	0	***	-5.58408	-4.43823
Flowering.LPWW - Harvest.LPWW	-2.10328	0	***	-2.6591	-1.54747
Flowering.LPWW - Mid Pod Fill.HPWD	-1.85874	0	***	-2.42704	-1.29043
Flowering.LPWW - Mid Pod Fill.HPWW	-1.21904	0	***	-1.77881	-0.659267
Flowering.LPWW - Mid Pod Fill.LPWD	-1.62611	0	***	-2.19005	-1.06218
Flowering.LPWW - Mid Pod Fill.LPWW	-0.585906	0.031	*	-1.14568	-0.026134
Harvest.HPWD - Harvest.HPWW	3.52953	0	***	2.96123	4.09784
Harvest.HPWD - Harvest.LPWD	1.43994	0	***	0.854888	2.02499
Harvest.HPWD - Harvest.LPWW	4.34781	0	***	3.7795	4.91612
Harvest.HPWD - Mid Pod Fill.HPWD	4.59236	0	***	4.01183	5.17289
Harvest.HPWD - Mid Pod Fill.HPWW	5.23205	0	***	4.65988	5.80423
Harvest.HPWD - Mid Pod Fill.LPWD	4.82498	0	***	4.24873	5.40123
Harvest.HPWD - Mid Pod Fill.LPWW	5.86519	0	***	5.29301	6.43736
Harvest.HPWW - Harvest.LPWD	-2.0896	0	***	-2.66252	-1.51667
Harvest.HPWW - Harvest.LPWW	0.818276	0.0001	***	0.26246	1.37409
Harvest.HPWW - Mid Pod Fill.HPWD	1.06282	0	***	0.494514	1.63113
Harvest.HPWW - Mid Pod Fill.HPWW	1.70252	0	***	1.14275	2.26229
Harvest.HPWW - Mid Pod Fill.LPWD	1.29544	0	***	0.731514	1.85938
Harvest.HPWW - Mid Pod Fill.LPWW	2.33565	0	***	1.77588	2.89543
Harvest.LPWD - Harvest.LPWW	2.90787	0	***	2.33495	3.4808
Harvest.LPWD - Mid Pod Fill.HPWD	3.15242	0	***	2.56737	3.73747
Harvest.LPWD - Mid Pod Fill.HPWW	3.79212	0	***	3.21536	4.36888
Harvest.LPWD - Mid Pod Fill.LPWD	3.38504	0	***	2.80424	3.96584
Harvest.LPWD - Mid Pod Fill.LPWW	4.42525	0	***	3.84849	5.00201
Harvest.LPWW - Mid Pod Fill.HPWD	0.244546	0.9602		-0.323762	0.812854
Harvest.LPWW - Mid Pod Fill.HPWW	0.884243	0	***	0.324471	1.44402
Harvest.LPWW - Mid Pod Fill.LPWD	0.477168	0.1918		-0.0867626	1.0411
Harvest.LPWW - Mid Pod Fill.LPWW	1.51738	0	***	0.957604	2.07715
Mid Pod Fill.HPWD - Mid Pod Fill.HPWW	0.639697	0.0141	*	0.0675195	1.21188
Mid Pod Fill.HPWD - Mid Pod Fill.LPWD	0.232622	0.9752		-0.343624	0.808869
Mid Pod Fill.HPWD - Mid Pod Fill.LPWW	1.27283	0	***	0.700652	1.84501
Mid Pod Fill.HPWW - Mid Pod Fill.LPWD	-0.407075	0.438		-0.974905	0.160755
Mid Pod Fill.HPWW - Mid Pod Fill.LPWW	0.633133	0.0133	*	0.069432	1.19683
Mid Pod Fill.LPWD - Mid Pod Fill.LPWW	1.04021	0	***	0.472377	1.60804
Treatment and stage are combined as a single factor. Means adjusted for lines and treatments.stage combinations
HSD test at ɑ = 0.05

## Sheet: SupTable6
Supplementary Table 6. Multiple comparison between different lines for carbon isotope abundance
Line Comparison	Difference	Pvalue	signif.	LCL	UCL
BFS 35 - BFS 81	0.49187	0.5363		-0.236627	1.22037
BFS 35 - CARIOCA	0.398876	0.8173		-0.329621	1.12737
BFS 35 - DOR 390	0.630348	0.1657		-0.0981493	1.35885
BFS 35 - NCB 226	0.713836	0.0567	.	-0.00928925	1.43696
BFS 35 - RCB 593	0.249735	0.9938		-0.484417	0.983887
BFS 35 - SEF 60	0.533616	0.3795		-0.184399	1.25163
BFS 35 - SEF 71	0.135552	1		-0.587574	0.858678
BFS 35 - SEF 73	-0.135513	1		-0.858639	0.587612
BFS 35 - SEN 56	0.762929	0.0262	*	0.0449138	1.48094
BFS 35 - SXB 412	0.401099	0.8272		-0.339014	1.14121
BFS 35 - TIO CANELA 75	0.454379	0.637		-0.263636	1.17239
BFS 81 - CARIOCA	-0.092994	1		-0.831826	0.645838
BFS 81 - DOR 390	0.138478	1		-0.600353	0.87731
BFS 81 - NCB 226	0.221966	0.9978		-0.511569	0.955501
BFS 81 - RCB 593	-0.242135	0.9957		-0.986543	0.502272
BFS 81 - SEF 60	0.0417461	1		-0.686752	0.770244
BFS 81 - SEF 71	-0.356318	0.9095		-1.08985	0.377217
BFS 81 - SEF 73	-0.627384	0.179		-1.36092	0.106152
BFS 81 - SEN 56	0.271059	0.9869		-0.457439	0.999556
BFS 81 - SXB 412	-0.0907716	1		-0.841059	0.659515
BFS 81 - TIO CANELA 75	-0.0374911	1		-0.765989	0.691007
CARIOCA - DOR 390	0.231472	0.9969		-0.507359	0.970304
CARIOCA - NCB 226	0.31496	0.9608		-0.418575	1.0485
CARIOCA - RCB 593	-0.149141	1		-0.893549	0.595266
CARIOCA - SEF 60	0.13474	1		-0.593758	0.863238
CARIOCA - SEF 71	-0.263324	0.9902		-0.99686	0.470211
CARIOCA - SEF 73	-0.53439	0.4118		-1.26792	0.199146
CARIOCA - SEN 56	0.364053	0.892		-0.364445	1.09255
CARIOCA - SXB 412	0.00222237	1		-0.748065	0.752509
CARIOCA - TIO CANELA 75	0.0555029	1		-0.672995	0.784001
DOR 390 - NCB 226	0.083488	1		-0.650047	0.817023
DOR 390 - RCB 593	-0.380613	0.876		-1.12502	0.363794
DOR 390 - SEF 60	-0.096732	1		-0.82523	0.631766
DOR 390 - SEF 71	-0.494796	0.5378		-1.22833	0.238739
DOR 390 - SEF 73	-0.765862	0.0319	*	-1.4994	-0.0323265
DOR 390 - SEN 56	0.132581	1		-0.595917	0.861078
DOR 390 - SXB 412	-0.22925	0.9976		-0.979537	0.521037
DOR 390 - TIO CANELA 75	-0.175969	0.9997		-0.904467	0.552529
NCB 226 - RCB 593	-0.464101	0.6486		-1.20325	0.27505
NCB 226 - SEF 60	-0.18022	0.9996		-0.903346	0.542906
NCB 226 - SEF 71	-0.578284	0.2771		-1.30648	0.149916
NCB 226 - SEF 73	-0.84935	0.008	**	-1.57755	-0.121149
NCB 226 - SEN 56	0.0490925	1		-0.674033	0.772218
NCB 226 - SXB 412	-0.312738	0.9668		-1.05781	0.432334
NCB 226 - TIO CANELA 75	-0.259457	0.9902		-0.982583	0.463668
RCB 593 - SEF 60	0.283881	0.9822		-0.450271	1.01803
RCB 593 - SEF 71	-0.114183	1		-0.853334	0.624968
RCB 593 - SEF 73	-0.385248	0.8613		-1.1244	0.353903
RCB 593 - SEN 56	0.513194	0.4796		-0.220958	1.24735
RCB 593 - SXB 412	0.151364	1		-0.604415	0.907142
RCB 593 - TIO CANELA 75	0.204644	0.9989		-0.529508	0.938797
SEF 60 - SEF 71	-0.398064	0.812		-1.12119	0.325061
SEF 60 - SEF 73	-0.66913	0.1005		-1.39226	0.053996
SEF 60 - SEN 56	0.229313	0.9964		-0.488703	0.947328
SEF 60 - SXB 412	-0.132518	1		-0.872631	0.607595
SEF 60 - TIO CANELA 75	-0.0792372	1		-0.797252	0.638778
SEF 71 - SEF 73	-0.271065	0.9868		-0.999266	0.457135
SEF 71 - SEN 56	0.627377	0.1627		-0.0957487	1.3505
SEF 71 - SXB 412	0.265547	0.9908		-0.479525	1.01062
SEF 71 - TIO CANELA 75	0.318827	0.9527		-0.404298	1.04195
SEF 73 - SEN 56	0.898442	0.0031	**	0.175317	1.62157
SEF 73 - SXB 412	0.536612	0.4306		-0.20846	1.28168
SEF 73 - TIO CANELA 75	0.589893	0.2392		-0.133233	1.31302
SEN 56 - SXB 412	-0.36183	0.9058		-1.10194	0.378283
SEN 56 - TIO CANELA 75	-0.30855	0.9606		-1.02656	0.409465
SXB 412 - TIO CANELA 75	0.0532805	1		-0.686833	0.793394
Line means adjusted for development stage and treatments
HSD test at ɑ = 0.05

## Sheet: SupTable7
Supplementary Table 7. Multiple comparison between different treatment and stage combinations in the concentration of minerals in leaf tissue
Comparison				Difference	Pvalue	signif.	LCL	UCL	Minerals
HPWD	Flowering	HPWD	Mid Pod Fill	0.619492	0	***	0.241165	0.997818	N
HPWD	Flowering	HPWW	Flowering	-0.0572944	0.9998		-0.432707	0.318118	N
HPWD	Flowering	HPWW	Mid Pod Fill	1.05213	0	***	0.679488	1.42478	N
HPWD	Flowering	LPWD	Flowering	-0.0508384	0.9999		-0.420849	0.319172	N
HPWD	Flowering	LPWD	Mid Pod Fill	0.094999	0.9943		-0.280414	0.470412	N
HPWD	Flowering	LPWW	Flowering	0.0274073	1		-0.342603	0.397418	N
HPWD	Flowering	LPWW	Mid Pod Fill	0.872551	0	***	0.499906	1.24519	N
HPWD	Mid Pod Fill	HPWW	Flowering	-0.676786	0	***	-1.0604	-0.293175	N
HPWD	Mid Pod Fill	HPWW	Mid Pod Fill	0.432641	0.0139	*	0.0517379	0.813543	N
HPWD	Mid Pod Fill	LPWD	Flowering	-0.67033	0	***	-1.04866	-0.292003	N
HPWD	Mid Pod Fill	LPWD	Mid Pod Fill	-0.524493	0.001	***	-0.908104	-0.140881	N
HPWD	Mid Pod Fill	LPWW	Flowering	-0.592084	0.0001	***	-0.970411	-0.213758	N
HPWD	Mid Pod Fill	LPWW	Mid Pod Fill	0.253059	0.4636		-0.127844	0.633962	N
HPWW	Flowering	HPWW	Mid Pod Fill	1.10943	0	***	0.731418	1.48744	N
HPWW	Flowering	LPWD	Flowering	0.00645602	1		-0.368957	0.381869	N
HPWW	Flowering	LPWD	Mid Pod Fill	0.152293	0.9247		-0.228445	0.533031	N
HPWW	Flowering	LPWW	Flowering	0.0847017	0.9972		-0.290711	0.460114	N
HPWW	Flowering	LPWW	Mid Pod Fill	0.929845	0	***	0.551836	1.30785	N
HPWW	Mid Pod Fill	LPWD	Flowering	-1.10297	0	***	-1.47562	-0.730326	N
HPWW	Mid Pod Fill	LPWD	Mid Pod Fill	-0.957133	0	***	-1.33514	-0.579125	N
HPWW	Mid Pod Fill	LPWW	Flowering	-1.02472	0	***	-1.39737	-0.652081	N
HPWW	Mid Pod Fill	LPWW	Mid Pod Fill	-0.179582	0.8266		-0.554841	0.195678	N
LPWD	Flowering	LPWD	Mid Pod Fill	0.145837	0.9351		-0.229575	0.52125	N
LPWD	Flowering	LPWW	Flowering	0.0782457	0.9982		-0.291765	0.448257	N
LPWD	Flowering	LPWW	Mid Pod Fill	0.923389	0	***	0.550745	1.29603	N
LPWD	Mid Pod Fill	LPWW	Flowering	-0.0675917	0.9994		-0.443004	0.307821	N
LPWD	Mid Pod Fill	LPWW	Mid Pod Fill	0.777552	0	***	0.399543	1.15556	N
LPWW	Flowering	LPWW	Mid Pod Fill	0.845143	0	***	0.472499	1.21779	N
HPWD	Flowering	HPWD	Mid Pod Fill	-13.1962	0	***	-20.3497	-6.04259	Ca
HPWD	Flowering	HPWW	Flowering	-0.754119	1		-7.80025	6.29201	Ca
HPWD	Flowering	HPWW	Mid Pod Fill	0.615576	1		-6.43055	7.6617	Ca
HPWD	Flowering	LPWD	Flowering	4.2631	0.5874		-2.78302	11.3092	Ca
HPWD	Flowering	LPWD	Mid Pod Fill	0.704404	1		-6.39407	7.80288	Ca
HPWD	Flowering	LPWW	Flowering	3.19776	0.8582		-3.79857	10.1941	Ca
HPWD	Flowering	LPWW	Mid Pod Fill	3.60631	0.7648		-3.39002	10.6026	Ca
HPWD	Mid Pod Fill	HPWW	Flowering	12.442	0	***	5.23976	19.6443	Ca
HPWD	Mid Pod Fill	HPWW	Mid Pod Fill	13.8117	0	***	6.60945	21.014	Ca
HPWD	Mid Pod Fill	LPWD	Flowering	17.4593	0	***	10.257	24.6615	Ca
HPWD	Mid Pod Fill	LPWD	Mid Pod Fill	13.9006	0	***	6.64706	21.1541	Ca
HPWD	Mid Pod Fill	LPWW	Flowering	16.3939	0	***	9.24034	23.5475	Ca
HPWD	Mid Pod Fill	LPWW	Mid Pod Fill	16.8025	0	***	9.6489	23.956	Ca
HPWW	Flowering	HPWW	Mid Pod Fill	1.3697	0.999		-5.72588	8.46527	Ca
HPWW	Flowering	LPWD	Flowering	5.01722	0.3792		-2.07835	12.1128	Ca
HPWW	Flowering	LPWD	Mid Pod Fill	1.45852	0.9985		-5.68903	8.60608	Ca
HPWW	Flowering	LPWW	Flowering	3.95188	0.6783		-3.09425	10.998	Ca
HPWW	Flowering	LPWW	Mid Pod Fill	4.36043	0.5584		-2.6857	11.4066	Ca
HPWW	Mid Pod Fill	LPWD	Flowering	3.64753	0.7673		-3.44805	10.7431	Ca
HPWW	Mid Pod Fill	LPWD	Mid Pod Fill	0.088828	1		-7.05873	7.23639	Ca
HPWW	Mid Pod Fill	LPWW	Flowering	2.58218	0.9521		-4.46395	9.62831	Ca
HPWW	Mid Pod Fill	LPWW	Mid Pod Fill	2.99074	0.8994		-4.05539	10.0369	Ca
LPWD	Flowering	LPWD	Mid Pod Fill	-3.5587	0.7954		-10.7063	3.58886	Ca
LPWD	Flowering	LPWW	Flowering	-1.06535	0.9998		-8.11148	5.98078	Ca
LPWD	Flowering	LPWW	Mid Pod Fill	-0.656793	1		-7.70292	6.38933	Ca
LPWD	Mid Pod Fill	LPWW	Flowering	2.49335	0.9618		-4.60512	9.59183	Ca
LPWD	Mid Pod Fill	LPWW	Mid Pod Fill	2.90191	0.9162		-4.19656	10.0004	Ca
LPWW	Flowering	LPWW	Mid Pod Fill	0.408554	1		-6.58778	7.40489	Ca
HPWD	Flowering	HPWD	Mid Pod Fill	-0.0147748	0	***	-0.0186516	-0.0108981	Fe
HPWD	Flowering	HPWW	Flowering	1.2753e-05	1		-0.00380577	0.00383127	Fe
HPWD	Flowering	HPWW	Mid Pod Fill	-0.00621944	0	***	-0.010038	-0.00240093	Fe
HPWD	Flowering	LPWD	Flowering	5.55229e-06	1		-0.00381297	0.00382407	Fe
HPWD	Flowering	LPWD	Mid Pod Fill	-0.00869727	0	***	-0.0125442	-0.00485038	Fe
HPWD	Flowering	LPWW	Flowering	1.66157e-05	1		-0.00377492	0.00380815	Fe
HPWD	Flowering	LPWW	Mid Pod Fill	-0.00312153	0.1934		-0.00691307	0.000669997	Fe
HPWD	Mid Pod Fill	HPWW	Flowering	0.0147876	0	***	0.0108845	0.0186907	Fe
HPWD	Mid Pod Fill	HPWW	Mid Pod Fill	0.0085554	0	***	0.00465225	0.0124585	Fe
HPWD	Mid Pod Fill	LPWD	Flowering	0.0147804	0	***	0.0108773	0.0186835	Fe
HPWD	Mid Pod Fill	LPWD	Mid Pod Fill	0.00607757	0.0001	***	0.00214667	0.0100085	Fe
HPWD	Mid Pod Fill	LPWW	Flowering	0.0147915	0	***	0.0109147	0.0186682	Fe
HPWD	Mid Pod Fill	LPWW	Mid Pod Fill	0.0116533	0	***	0.00777656	0.0155301	Fe
HPWW	Flowering	HPWW	Mid Pod Fill	-0.0062322	0	***	-0.0100775	-0.00238688	Fe
HPWW	Flowering	LPWD	Flowering	-7.20074e-06	1		-0.00385252	0.00383811	Fe
HPWW	Flowering	LPWD	Mid Pod Fill	-0.00871002	0	***	-0.0125835	-0.00483653	Fe
HPWW	Flowering	LPWW	Flowering	3.86262e-06	1		-0.00381466	0.00382238	Fe
HPWW	Flowering	LPWW	Mid Pod Fill	-0.00313429	0.1966		-0.00695281	0.00068423	Fe
HPWW	Mid Pod Fill	LPWD	Flowering	0.006225	0	***	0.00237968	0.0100703	Fe
HPWW	Mid Pod Fill	LPWD	Mid Pod Fill	-0.00247782	0.5147		-0.00635131	0.00139566	Fe
HPWW	Mid Pod Fill	LPWW	Flowering	0.00623606	0	***	0.00241754	0.0100546	Fe
HPWW	Mid Pod Fill	LPWW	Mid Pod Fill	0.00309791	0.2091		-0.00072061	0.00691643	Fe
LPWD	Flowering	LPWD	Mid Pod Fill	-0.00870282	0	***	-0.0125763	-0.00482933	Fe
LPWD	Flowering	LPWW	Flowering	1.10634e-05	1		-0.00380745	0.00382958	Fe
LPWD	Flowering	LPWW	Mid Pod Fill	-0.00312709	0.199		-0.00694561	0.000691431	Fe
LPWD	Mid Pod Fill	LPWW	Flowering	0.00871388	0	***	0.004867	0.0125608	Fe
LPWD	Mid Pod Fill	LPWW	Mid Pod Fill	0.00557573	0.0004	***	0.00172885	0.00942262	Fe
LPWW	Flowering	LPWW	Mid Pod Fill	-0.00313815	0.1879		-0.00692968	0.000653381	Fe
HPWD	Flowering	HPWD	Mid Pod Fill	-3.41663	0.6967		-9.61105	2.7778	K
HPWD	Flowering	HPWW	Flowering	-2.76788	0.8629		-8.86927	3.33351	K
HPWD	Flowering	HPWW	Mid Pod Fill	0.752655	0.9999		-5.34873	6.85404	K
HPWD	Flowering	LPWD	Flowering	1.45886	0.996		-4.64253	7.56025	K
HPWD	Flowering	LPWD	Mid Pod Fill	1.10794	0.9993		-5.03877	7.25466	K
HPWD	Flowering	LPWW	Flowering	-0.208829	1		-6.2671	5.84944	K
HPWD	Flowering	LPWW	Mid Pod Fill	3.26967	0.7198		-2.7886	9.32794	K
HPWD	Mid Pod Fill	HPWW	Flowering	0.64875	1		-5.58785	6.88535	K
HPWD	Mid Pod Fill	HPWW	Mid Pod Fill	4.16928	0.4552		-2.06732	10.4059	K
HPWD	Mid Pod Fill	LPWD	Flowering	4.87549	0.2512		-1.36111	11.1121	K
HPWD	Mid Pod Fill	LPWD	Mid Pod Fill	4.52457	0.3544		-1.75638	10.8055	K
HPWD	Mid Pod Fill	LPWW	Flowering	3.2078	0.7605		-2.98662	9.40222	K
HPWD	Mid Pod Fill	LPWW	Mid Pod Fill	6.6863	0.0242	*	0.491874	12.8807	K
HPWW	Flowering	HPWW	Mid Pod Fill	3.52053	0.6538		-2.62367	9.66474	K
HPWW	Flowering	LPWD	Flowering	4.22674	0.4163		-1.91746	10.3709	K
HPWW	Flowering	LPWD	Mid Pod Fill	3.87582	0.5429		-2.31339	10.065	K
HPWW	Flowering	LPWW	Flowering	2.55905	0.905		-3.54234	8.66044	K
HPWW	Flowering	LPWW	Mid Pod Fill	6.03755	0.0547	.	-0.063838	12.1389	K
HPWW	Mid Pod Fill	LPWD	Flowering	0.706205	1		-5.438	6.85041	K
HPWW	Mid Pod Fill	LPWD	Mid Pod Fill	0.355289	1		-5.83393	6.54451	K
HPWW	Mid Pod Fill	LPWW	Flowering	-0.961484	0.9997		-7.06287	5.1399	K
HPWW	Mid Pod Fill	LPWW	Mid Pod Fill	2.51701	0.9123		-3.58437	8.6184	K
LPWD	Flowering	LPWD	Mid Pod Fill	-0.350916	1		-6.54013	5.8383	K
LPWD	Flowering	LPWW	Flowering	-1.66769	0.9909		-7.76908	4.4337	K
LPWD	Flowering	LPWW	Mid Pod Fill	1.81081	0.9852		-4.29058	7.9122	K
LPWD	Mid Pod Fill	LPWW	Flowering	-1.31677	0.998		-7.46349	4.82994	K
LPWD	Mid Pod Fill	LPWW	Mid Pod Fill	2.16173	0.9615		-3.98499	8.30844	K
LPWW	Flowering	LPWW	Mid Pod Fill	3.4785	0.6513		-2.57977	9.53677	K
HPWD	Flowering	HPWD	Mid Pod Fill	-2.92347	0.0003	***	-4.91584	-0.931096	Mg
HPWD	Flowering	HPWW	Flowering	-0.30284	0.9998		-2.26529	1.65961	Mg
HPWD	Flowering	HPWW	Mid Pod Fill	0.0918542	1		-1.87059	2.0543	Mg
HPWD	Flowering	LPWD	Flowering	0.87505	0.8733		-1.0874	2.8375	Mg
HPWD	Flowering	LPWD	Mid Pod Fill	0.39813	0.9987		-1.5789	2.37516	Mg
HPWD	Flowering	LPWW	Flowering	0.728054	0.9469		-1.22053	2.67663	Mg
HPWD	Flowering	LPWW	Mid Pod Fill	1.3937	0.3639		-0.554881	3.34228	Mg
HPWD	Mid Pod Fill	HPWW	Flowering	2.62063	0.0021	**	0.61469	4.62657	Mg
HPWD	Mid Pod Fill	HPWW	Mid Pod Fill	3.01532	0.0002	***	1.00938	5.02126	Mg
HPWD	Mid Pod Fill	LPWD	Flowering	3.79852	0	***	1.79258	5.80446	Mg
HPWD	Mid Pod Fill	LPWD	Mid Pod Fill	3.3216	0	***	1.3014	5.3418	Mg
HPWD	Mid Pod Fill	LPWW	Flowering	3.65152	0	***	1.65915	5.6439	Mg
HPWD	Mid Pod Fill	LPWW	Mid Pod Fill	4.31717	0	***	2.3248	6.30954	Mg
HPWW	Flowering	HPWW	Mid Pod Fill	0.394695	0.9987		-1.58153	2.37091	Mg
HPWW	Flowering	LPWD	Flowering	1.17789	0.6062		-0.79833	3.15411	Mg
HPWW	Flowering	LPWD	Mid Pod Fill	0.70097	0.9613		-1.28973	2.69167	Mg
HPWW	Flowering	LPWW	Flowering	1.03089	0.7469		-0.931554	2.99334	Mg
HPWW	Flowering	LPWW	Mid Pod Fill	1.69654	0.146		-0.26591	3.65899	Mg
HPWW	Mid Pod Fill	LPWD	Flowering	0.783196	0.9282		-1.19302	2.75942	Mg
HPWW	Mid Pod Fill	LPWD	Mid Pod Fill	0.306276	0.9998		-1.68442	2.29697	Mg
HPWW	Mid Pod Fill	LPWW	Flowering	0.6362	0.9755		-1.32625	2.59865	Mg
HPWW	Mid Pod Fill	LPWW	Mid Pod Fill	1.30184	0.4657		-0.660604	3.26429	Mg
LPWD	Flowering	LPWD	Mid Pod Fill	-0.47692	0.996		-2.46762	1.51378	Mg
LPWD	Flowering	LPWW	Flowering	-0.146996	1		-2.10944	1.81545	Mg
LPWD	Flowering	LPWW	Mid Pod Fill	0.518649	0.9926		-1.4438	2.4811	Mg
LPWD	Mid Pod Fill	LPWW	Flowering	0.329924	0.9996		-1.6471	2.30695	Mg
LPWD	Mid Pod Fill	LPWW	Mid Pod Fill	0.995569	0.7857		-0.981458	2.9726	Mg
LPWW	Flowering	LPWW	Mid Pod Fill	0.665645	0.9672		-1.28293	2.61422	Mg
HPWD	Flowering	HPWD	Mid Pod Fill	0.0711982	0.9995		-0.33597	0.478367	P
HPWD	Flowering	HPWW	Flowering	-0.537937	0.0014	**	-0.93899	-0.136884	P
HPWD	Flowering	HPWW	Mid Pod Fill	-0.43263	0.0244	*	-0.833683	-0.0315769	P
HPWD	Flowering	LPWD	Flowering	0.200283	0.7928		-0.20077	0.601336	P
HPWD	Flowering	LPWD	Mid Pod Fill	0.445511	0.0193	*	0.0414789	0.849543	P
HPWD	Flowering	LPWW	Flowering	-0.283132	0.3718		-0.68135	0.115087	P
HPWD	Flowering	LPWW	Mid Pod Fill	0.115624	0.987		-0.282595	0.513842	P
HPWD	Mid Pod Fill	HPWW	Flowering	-0.609135	0.0002	***	-1.01908	-0.199194	P
HPWD	Mid Pod Fill	HPWW	Mid Pod Fill	-0.503828	0.0052	**	-0.913769	-0.0938871	P
HPWD	Mid Pod Fill	LPWD	Flowering	0.129085	0.9792		-0.280856	0.539026	P
HPWD	Mid Pod Fill	LPWD	Mid Pod Fill	0.374313	0.1071		-0.0385431	0.787169	P
HPWD	Mid Pod Fill	LPWW	Flowering	-0.35433	0.1401		-0.761498	0.0528385	P
HPWD	Mid Pod Fill	LPWW	Mid Pod Fill	0.0444255	1		-0.362743	0.451594	P
HPWW	Flowering	HPWW	Mid Pod Fill	0.105307	0.9932		-0.29856	0.509174	P
HPWW	Flowering	LPWD	Flowering	0.73822	0	***	0.334353	1.14209	P
HPWW	Flowering	LPWD	Mid Pod Fill	0.983448	0	***	0.576622	1.39027	P
HPWW	Flowering	LPWW	Flowering	0.254805	0.5237		-0.146248	0.655858	P
HPWW	Flowering	LPWW	Mid Pod Fill	0.65356	0	***	0.252508	1.05461	P
HPWW	Mid Pod Fill	LPWD	Flowering	0.632913	0.0001	***	0.229046	1.03678	P
HPWW	Mid Pod Fill	LPWD	Mid Pod Fill	0.878141	0	***	0.471315	1.28497	P
HPWW	Mid Pod Fill	LPWW	Flowering	0.149498	0.9476		-0.251555	0.550551	P
HPWW	Mid Pod Fill	LPWW	Mid Pod Fill	0.548253	0.001	***	0.147201	0.949306	P
LPWD	Flowering	LPWD	Mid Pod Fill	0.245228	0.5921		-0.161598	0.652054	P
LPWD	Flowering	LPWW	Flowering	-0.483415	0.0067	**	-0.884468	-0.082362	P
LPWD	Flowering	LPWW	Mid Pod Fill	-0.0846595	0.9982		-0.485712	0.316393	P
LPWD	Mid Pod Fill	LPWW	Flowering	-0.728643	0	***	-1.13267	-0.324611	P
LPWD	Mid Pod Fill	LPWW	Mid Pod Fill	-0.329887	0.2022		-0.73392	0.0741448	P
LPWW	Flowering	LPWW	Mid Pod Fill	0.398755	0.0494	*	0.000536842	0.796974	P
HPWD	Flowering	HPWD	Mid Pod Fill	-0.711039	0	***	-0.913334	-0.508743	S
HPWD	Flowering	HPWW	Flowering	0.0762755	0.9398		-0.122981	0.275532	S
HPWD	Flowering	HPWW	Mid Pod Fill	0.0806449	0.9202		-0.118612	0.279902	S
HPWD	Flowering	LPWD	Flowering	-0.0768973	0.9372		-0.276154	0.122359	S
HPWD	Flowering	LPWD	Mid Pod Fill	-0.549243	0	***	-0.74998	-0.348506	S
HPWD	Flowering	LPWW	Flowering	0.108217	0.7057		-0.0896318	0.306065	S
HPWD	Flowering	LPWW	Mid Pod Fill	0.167878	0.1632		-0.0299709	0.365726	S
HPWD	Mid Pod Fill	HPWW	Flowering	0.787314	0	***	0.583641	0.990987	S
HPWD	Mid Pod Fill	HPWW	Mid Pod Fill	0.791683	0	***	0.588011	0.995356	S
HPWD	Mid Pod Fill	LPWD	Flowering	0.634141	0	***	0.430469	0.837814	S
HPWD	Mid Pod Fill	LPWD	Mid Pod Fill	0.161795	0.2407		-0.0433256	0.366916	S
HPWD	Mid Pod Fill	LPWW	Flowering	0.819255	0	***	0.61696	1.02155	S
HPWD	Mid Pod Fill	LPWW	Mid Pod Fill	0.878916	0	***	0.676621	1.08121	S
HPWW	Flowering	HPWW	Mid Pod Fill	0.00436939	1		-0.196286	0.205024	S
HPWW	Flowering	LPWD	Flowering	-0.153173	0.28		-0.353828	0.0474822	S
HPWW	Flowering	LPWD	Mid Pod Fill	-0.625519	0	***	-0.827644	-0.423394	S
HPWW	Flowering	LPWW	Flowering	0.0319412	0.9997		-0.167316	0.231198	S
HPWW	Flowering	LPWW	Mid Pod Fill	0.0916021	0.8545		-0.107655	0.290859	S
HPWW	Mid Pod Fill	LPWD	Flowering	-0.157542	0.2461		-0.358197	0.0431128	S
HPWW	Mid Pod Fill	LPWD	Mid Pod Fill	-0.629888	0	***	-0.832013	-0.427763	S
HPWW	Mid Pod Fill	LPWW	Flowering	0.0275718	0.9999		-0.171685	0.226828	S
HPWW	Mid Pod Fill	LPWW	Mid Pod Fill	0.0872327	0.8836		-0.112024	0.286489	S
LPWD	Flowering	LPWD	Mid Pod Fill	-0.472346	0	***	-0.674471	-0.270221	S
LPWD	Flowering	LPWW	Flowering	0.185114	0.0901	.	-0.0141427	0.384371	S
LPWD	Flowering	LPWW	Mid Pod Fill	0.244775	0.0052	**	0.0455182	0.444032	S
LPWD	Mid Pod Fill	LPWW	Flowering	0.65746	0	***	0.456723	0.858197	S
LPWD	Mid Pod Fill	LPWW	Mid Pod Fill	0.717121	0	***	0.516384	0.917858	S
LPWW	Flowering	LPWW	Mid Pod Fill	0.0596609	0.9838		-0.138188	0.257509	S
HPWD	Flowering	HPWD	Mid Pod Fill	-0.0027841	0.6139		-0.00748435	0.00191615	Zn
HPWD	Flowering	HPWW	Flowering	-0.00110885	0.996		-0.00573851	0.0035208	Zn
HPWD	Flowering	HPWW	Mid Pod Fill	-0.000201597	1		-0.00483125	0.00442806	Zn
HPWD	Flowering	LPWD	Flowering	-0.0016961	0.9521		-0.00632575	0.00293355	Zn
HPWD	Flowering	LPWD	Mid Pod Fill	-0.00275232	0.6185		-0.00741637	0.00191173	Zn
HPWD	Flowering	LPWW	Flowering	-0.00126108	0.9907		-0.00585802	0.00333585	Zn
HPWD	Flowering	LPWW	Mid Pod Fill	0.00212674	0.8504		-0.0024702	0.00672367	Zn
HPWD	Mid Pod Fill	HPWW	Flowering	0.00167525	0.9601		-0.003057	0.0064075	Zn
HPWD	Mid Pod Fill	HPWW	Mid Pod Fill	0.00258251	0.7082		-0.00214975	0.00731476	Zn
HPWD	Mid Pod Fill	LPWD	Flowering	0.001088	0.9969		-0.00364425	0.00582025	Zn
HPWD	Mid Pod Fill	LPWD	Mid Pod Fill	3.1783e-05	1		-0.00473412	0.00479769	Zn
HPWD	Mid Pod Fill	LPWW	Flowering	0.00152302	0.9755		-0.00317723	0.00622327	Zn
HPWD	Mid Pod Fill	LPWW	Mid Pod Fill	0.00491084	0.0335	*	0.00021059	0.00961109	Zn
HPWW	Flowering	HPWW	Mid Pod Fill	0.000907257	0.9989		-0.00375488	0.0055694	Zn
HPWW	Flowering	LPWD	Flowering	-0.000587249	0.9999		-0.00524939	0.00407489	Zn
HPWW	Flowering	LPWD	Mid Pod Fill	-0.00164347	0.9626		-0.00633976	0.00305283	Zn
HPWW	Flowering	LPWW	Flowering	-0.000152229	1		-0.00478188	0.00447742	Zn
HPWW	Flowering	LPWW	Mid Pod Fill	0.00323559	0.3949		-0.00139406	0.00786524	Zn
HPWW	Mid Pod Fill	LPWD	Flowering	-0.0014945	0.977		-0.00615665	0.00316764	Zn
HPWW	Mid Pod Fill	LPWD	Mid Pod Fill	-0.00255072	0.7132		-0.00724702	0.00214557	Zn
HPWW	Mid Pod Fill	LPWW	Flowering	-0.00105949	0.997		-0.00568914	0.00357017	Zn
HPWW	Mid Pod Fill	LPWW	Mid Pod Fill	0.00232833	0.7868		-0.00230132	0.00695798	Zn
LPWD	Flowering	LPWD	Mid Pod Fill	-0.00105622	0.9973		-0.00575251	0.00364008	Zn
LPWD	Flowering	LPWW	Flowering	0.00043502	1		-0.00419463	0.00506467	Zn
LPWD	Flowering	LPWW	Mid Pod Fill	0.00382284	0.1904		-0.000806815	0.00845249	Zn
LPWD	Mid Pod Fill	LPWW	Flowering	0.00149124	0.9773		-0.00317281	0.00615528	Zn
LPWD	Mid Pod Fill	LPWW	Mid Pod Fill	0.00487906	0.0331	*	0.00021501	0.0095431	Zn
LPWW	Flowering	LPWW	Mid Pod Fill	0.00338782	0.3246		-0.00120912	0.00798475	Zn
Mean comparisons are calculated according to minerals
HSD test at ɑ = 0.05

## Sheet: SupTable8
Supplementary Table 8. Multiple comparison between lines on the concentration of minerals in the leaf tissue
Line Comparison	Difference	Pvalue	signif.	LCL	UCL	Minerals
BFS 35 - BFS 81	0.21398	0.9711		-0.307786	0.735746	N
BFS 35 - CARIOCA	0.18926	0.9889		-0.332506	0.711026	N
BFS 35 - DOR 390	0.0855254	1		-0.436241	0.607291	N
BFS 35 - NCB 226	0.114536	0.9999		-0.40165	0.630721	N
BFS 35 - RCB 593	0.0792227	1		-0.45508	0.613525	N
BFS 35 - SEF 60	0.444642	0.1694		-0.0715437	0.960827	N
BFS 35 - SEF 71	0.305917	0.7235		-0.210268	0.822103	N
BFS 35 - SEF 73	0.0253835	1		-0.496383	0.54715	N
BFS 35 - SEN 56	0.579468	0.0136	*	0.0632826	1.09565	N
BFS 35 - SXB 412	0.59664	0.0124	*	0.0688535	1.12443	N
BFS 35 - TIO CANELA 75	0.299441	0.7501		-0.216745	0.815626	N
BFS 81 - CARIOCA	-0.0247203	1		-0.552008	0.502567	N
BFS 81 - DOR 390	-0.128455	0.9997		-0.655742	0.398833	N
BFS 81 - NCB 226	-0.0994443	1		-0.62121	0.422322	N
BFS 81 - RCB 593	-0.134757	0.9996		-0.674453	0.404939	N
BFS 81 - SEF 60	0.230662	0.9503		-0.291104	0.752428	N
BFS 81 - SEF 71	0.0919374	1		-0.429829	0.613703	N
BFS 81 - SEF 73	-0.188596	0.9901		-0.715884	0.338691	N
BFS 81 - SEN 56	0.365488	0.4721		-0.156278	0.887254	N
BFS 81 - SXB 412	0.38266	0.4327		-0.150585	0.915906	N
BFS 81 - TIO CANELA 75	0.0854608	1		-0.436305	0.607227	N
CARIOCA - DOR 390	-0.103734	1		-0.631022	0.423553	N
CARIOCA - NCB 226	-0.074724	1		-0.59649	0.447042	N
CARIOCA - RCB 593	-0.110037	0.9999		-0.649733	0.429659	N
CARIOCA - SEF 60	0.255382	0.9026		-0.266384	0.777148	N
CARIOCA - SEF 71	0.116658	0.9999		-0.405108	0.638424	N
CARIOCA - SEF 73	-0.163876	0.997		-0.691164	0.363411	N
CARIOCA - SEN 56	0.390209	0.366		-0.131557	0.911975	N
CARIOCA - SXB 412	0.407381	0.3326		-0.125865	0.940626	N
CARIOCA - TIO CANELA 75	0.110181	0.9999		-0.411585	0.631947	N
DOR 390 - NCB 226	0.0290102	1		-0.492756	0.550776	N
DOR 390 - RCB 593	-0.00630264	1		-0.545999	0.533393	N
DOR 390 - SEF 60	0.359116	0.5008		-0.16265	0.880883	N
DOR 390 - SEF 71	0.220392	0.9641		-0.301374	0.742158	N
DOR 390 - SEF 73	-0.0601418	1		-0.587429	0.467146	N
DOR 390 - SEN 56	0.493943	0.0827	.	-0.0278233	1.01571	N
DOR 390 - SXB 412	0.511115	0.0742	.	-0.022131	1.04436	N
DOR 390 - TIO CANELA 75	0.213915	0.9711		-0.307851	0.735681	N
NCB 226 - RCB 593	-0.0353129	1		-0.569616	0.49899	N
NCB 226 - SEF 60	0.330106	0.6168		-0.186079	0.846292	N
NCB 226 - SEF 71	0.191382	0.9868		-0.324804	0.707567	N
NCB 226 - SEF 73	-0.089152	1		-0.610918	0.432614	N
NCB 226 - SEN 56	0.464933	0.1234		-0.0512529	0.981118	N
NCB 226 - SXB 412	0.482105	0.1108		-0.045682	1.00989	N
NCB 226 - TIO CANELA 75	0.184905	0.99		-0.33128	0.701091	N
RCB 593 - SEF 60	0.365419	0.5111		-0.168884	0.899722	N
RCB 593 - SEF 71	0.226695	0.9629		-0.307608	0.760997	N
RCB 593 - SEF 73	-0.0538392	1		-0.593535	0.485857	N
RCB 593 - SEN 56	0.500245	0.0908	.	-0.0340573	1.03455	N
RCB 593 - SXB 412	0.517417	0.0814	.	-0.0281013	1.06294	N
RCB 593 - TIO CANELA 75	0.220218	0.97		-0.314085	0.754521	N
SEF 60 - SEF 71	-0.138725	0.9992		-0.65491	0.377461	N
SEF 60 - SEF 73	-0.419258	0.2578		-0.941024	0.102508	N
SEF 60 - SEN 56	0.134826	0.9994		-0.381359	0.651012	N
SEF 60 - SXB 412	0.151998	0.9985		-0.375788	0.679785	N
SEF 60 - TIO CANELA 75	-0.145201	0.9988		-0.661387	0.370984	N
SEF 71 - SEF 73	-0.280534	0.8311		-0.8023	0.241232	N
SEF 71 - SEN 56	0.273551	0.8441		-0.242635	0.789736	N
SEF 71 - SXB 412	0.290723	0.8076		-0.237064	0.81851	N
SEF 71 - TIO CANELA 75	-0.00647654	1		-0.522662	0.509709	N
SEF 73 - SEN 56	0.554085	0.0265	*	0.0323186	1.07585	N
SEF 73 - SXB 412	0.571257	0.024	*	0.0380109	1.1045	N
SEF 73 - TIO CANELA 75	0.274057	0.8517		-0.247709	0.795823	N
SEN 56 - SXB 412	0.017172	1		-0.510615	0.544959	N
SEN 56 - TIO CANELA 75	-0.280027	0.8227		-0.796213	0.236158	N
SXB 412 - TIO CANELA 75	-0.297199	0.7844		-0.824986	0.230587	N
BFS 35 - BFS 81	1.6275	1		-7.98044	11.2354	Ca
BFS 35 - CARIOCA	2.81497	0.9984		-6.89685	12.5268	Ca
BFS 35 - DOR 390	-0.11599	1		-9.8278	9.59582	Ca
BFS 35 - NCB 226	1.67892	1		-7.92902	11.2869	Ca
BFS 35 - RCB 593	5.6386	0.7768		-4.30656	15.5838	Ca
BFS 35 - SEF 60	1.1358	1		-8.47214	10.7437	Ca
BFS 35 - SEF 71	4.10947	0.9607		-5.49847	13.7174	Ca
BFS 35 - SEF 73	0.81355	1		-8.89826	10.5254	Ca
BFS 35 - SEN 56	0.522303	1		-9.08564	10.1302	Ca
BFS 35 - SXB 412	2.42751	0.9996		-7.39637	12.2514	Ca
BFS 35 - TIO CANELA 75	1.25816	1		-8.34978	10.8661	Ca
BFS 81 - CARIOCA	1.18747	1		-8.52435	10.8993	Ca
BFS 81 - DOR 390	-1.74349	1		-11.4553	7.96832	Ca
BFS 81 - NCB 226	0.0514176	1		-9.55652	9.65936	Ca
BFS 81 - RCB 593	4.0111	0.9745		-5.93406	13.9563	Ca
BFS 81 - SEF 60	-0.491699	1		-10.0996	9.11624	Ca
BFS 81 - SEF 71	2.48197	0.9995		-7.12597	12.0899	Ca
BFS 81 - SEF 73	-0.813949	1		-10.5258	8.89786	Ca
BFS 81 - SEN 56	-1.1052	1		-10.7131	8.50274	Ca
BFS 81 - SXB 412	0.800007	1		-9.02387	10.6239	Ca
BFS 81 - TIO CANELA 75	-0.369343	1		-9.97728	9.2386	Ca
CARIOCA - DOR 390	-2.93096	0.9979		-12.7455	6.88363	Ca
CARIOCA - NCB 226	-1.13605	1		-10.8479	8.57576	Ca
CARIOCA - RCB 593	2.82364	0.9988		-7.22191	12.8692	Ca
CARIOCA - SEF 60	-1.67917	1		-11.391	8.03265	Ca
CARIOCA - SEF 71	1.2945	1		-8.41731	11.0063	Ca
CARIOCA - SEF 73	-2.00142	0.9999		-11.816	7.81317	Ca
CARIOCA - SEN 56	-2.29266	0.9998		-12.0045	7.41915	Ca
CARIOCA - SXB 412	-0.38746	1		-10.3129	9.53803	Ca
CARIOCA - TIO CANELA 75	-1.55681	1		-11.2686	8.155	Ca
DOR 390 - NCB 226	1.79491	1		-7.91691	11.5067	Ca
DOR 390 - RCB 593	5.75459	0.7651		-4.29096	15.8001	Ca
DOR 390 - SEF 60	1.25179	1		-8.46002	10.9636	Ca
DOR 390 - SEF 71	4.22546	0.9556		-5.48636	13.9373	Ca
DOR 390 - SEF 73	0.929539	1		-8.88505	10.7441	Ca
DOR 390 - SEN 56	0.638293	1		-9.07352	10.3501	Ca
DOR 390 - SXB 412	2.5435	0.9995		-7.38199	12.469	Ca
DOR 390 - TIO CANELA 75	1.37415	1		-8.33767	11.086	Ca
NCB 226 - RCB 593	3.95969	0.9769		-5.98548	13.9048	Ca
NCB 226 - SEF 60	-0.543117	1		-10.1511	9.06482	Ca
NCB 226 - SEF 71	2.43055	0.9996		-7.17739	12.0385	Ca
NCB 226 - SEF 73	-0.865367	1		-10.5772	8.84644	Ca
NCB 226 - SEN 56	-1.15661	1		-10.7646	8.45133	Ca
NCB 226 - SXB 412	0.748589	1		-9.07529	10.5725	Ca
NCB 226 - TIO CANELA 75	-0.42076	1		-10.0287	9.18718	Ca
RCB 593 - SEF 60	-4.5028	0.9414		-14.448	5.44236	Ca
RCB 593 - SEF 71	-1.52914	1		-11.4743	8.41603	Ca
RCB 593 - SEF 73	-4.82505	0.9136		-14.8706	5.2205	Ca
RCB 593 - SEN 56	-5.1163	0.8685		-15.0615	4.82886	Ca
RCB 593 - SXB 412	-3.2111	0.9965		-13.365	6.94283	Ca
RCB 593 - TIO CANELA 75	-4.38045	0.9516		-14.3256	5.56472	Ca
SEF 60 - SEF 71	2.97367	0.9971		-6.63427	12.5816	Ca
SEF 60 - SEF 73	-0.32225	1		-10.0341	9.38956	Ca
SEF 60 - SEN 56	-0.613496	1		-10.2214	8.99444	Ca
SEF 60 - SXB 412	1.29171	1		-8.53217	11.1156	Ca
SEF 60 - TIO CANELA 75	0.122356	1		-9.48558	9.7303	Ca
SEF 71 - SEF 73	-3.29592	0.9936		-13.0077	6.4159	Ca
SEF 71 - SEN 56	-3.58716	0.986		-13.1951	6.02078	Ca
SEF 71 - SXB 412	-1.68196	1		-11.5058	8.14191	Ca
SEF 71 - TIO CANELA 75	-2.85131	0.998		-12.4592	6.75663	Ca
SEF 73 - SEN 56	-0.291246	1		-10.0031	9.42057	Ca
SEF 73 - SXB 412	1.61396	1		-8.31153	11.5394	Ca
SEF 73 - TIO CANELA 75	0.444606	1		-9.26721	10.1564	Ca
SEN 56 - SXB 412	1.9052	1		-7.91867	11.7291	Ca
SEN 56 - TIO CANELA 75	0.735853	1		-8.87209	10.3438	Ca
SXB 412 - TIO CANELA 75	-1.16935	1		-10.9932	8.65452	Ca
BFS 35 - BFS 81	0.000956882	1		-0.00444157	0.00635534	Fe
BFS 35 - CARIOCA	-0.000960536	1		-0.00641735	0.00449628	Fe
BFS 35 - DOR 390	-0.00332996	0.6847		-0.00878677	0.00212686	Fe
BFS 35 - NCB 226	0.000615958	1		-0.0047825	0.00601441	Fe
BFS 35 - RCB 593	0.00224598	0.9751		-0.00334196	0.00783391	Fe
BFS 35 - SEF 60	0.000556033	1		-0.00484242	0.00595449	Fe
BFS 35 - SEF 71	-0.000803958	1		-0.00620241	0.0045945	Fe
BFS 35 - SEF 73	-0.00037203	1		-0.00582885	0.00508479	Fe
BFS 35 - SEN 56	-0.000259861	1		-0.00565831	0.00513859	Fe
BFS 35 - SXB 412	0.00236311	0.9604		-0.00315667	0.00788289	Fe
BFS 35 - TIO CANELA 75	-0.00278994	0.8649		-0.00818839	0.00260852	Fe
BFS 81 - CARIOCA	-0.00191742	0.9915		-0.00737423	0.0035394	Fe
BFS 81 - DOR 390	-0.00428684	0.2904		-0.00974366	0.00116998	Fe
BFS 81 - NCB 226	-0.000340924	1		-0.00573938	0.00505753	Fe
BFS 81 - RCB 593	0.00128909	0.9998		-0.00429884	0.00687702	Fe
BFS 81 - SEF 60	-0.000400849	1		-0.0057993	0.0049976	Fe
BFS 81 - SEF 71	-0.00176084	0.9955		-0.00715929	0.00363761	Fe
BFS 81 - SEF 73	-0.00132891	0.9997		-0.00678573	0.0041279	Fe
BFS 81 - SEN 56	-0.00121674	0.9999		-0.0066152	0.00418171	Fe
BFS 81 - SXB 412	0.00140623	0.9995		-0.00411355	0.00692601	Fe
BFS 81 - TIO CANELA 75	-0.00374682	0.4872		-0.00914527	0.00165163	Fe
CARIOCA - DOR 390	-0.00236942	0.9594		-0.00788398	0.00314514	Fe
CARIOCA - NCB 226	0.00157649	0.9985		-0.00388032	0.00703331	Fe
CARIOCA - RCB 593	0.00320651	0.7746		-0.00243782	0.00885085	Fe
CARIOCA - SEF 60	0.00151657	0.9989		-0.00394025	0.00697339	Fe
CARIOCA - SEF 71	0.000156578	1		-0.00530024	0.00561339	Fe
CARIOCA - SEF 73	0.000588506	1		-0.00492606	0.00610307	Fe
CARIOCA - SEN 56	0.000700674	1		-0.00475614	0.00615749	Fe
CARIOCA - SXB 412	0.00332365	0.7164		-0.00225323	0.00890052	Fe
CARIOCA - TIO CANELA 75	-0.0018294	0.9942		-0.00728622	0.00362742	Fe
DOR 390 - NCB 226	0.00394592	0.4202		-0.0015109	0.00940273	Fe
DOR 390 - RCB 593	0.00557593	0.0563	.	-6.84022e-05	0.0112203	Fe
DOR 390 - SEF 60	0.00388599	0.4452		-0.00157083	0.00934281	Fe
DOR 390 - SEF 71	0.002526	0.932		-0.00293082	0.00798282	Fe
DOR 390 - SEF 73	0.00295793	0.8333		-0.00255664	0.00847249	Fe
DOR 390 - SEN 56	0.0030701	0.7854		-0.00238672	0.00852691	Fe
DOR 390 - SXB 412	0.00569307	0.0406	*	0.000116191	0.0112699	Fe
DOR 390 - TIO CANELA 75	0.00054002	1		-0.0049168	0.00599684	Fe
NCB 226 - RCB 593	0.00163002	0.9983		-0.00395791	0.00721795	Fe
NCB 226 - SEF 60	-5.99249e-05	1		-0.00545838	0.00533853	Fe
NCB 226 - SEF 71	-0.00141992	0.9994		-0.00681837	0.00397854	Fe
NCB 226 - SEF 73	-0.000987988	1		-0.0064448	0.00446883	Fe
NCB 226 - SEN 56	-0.000875819	1		-0.00627427	0.00452263	Fe
NCB 226 - SXB 412	0.00174715	0.9965		-0.00377263	0.00726693	Fe
NCB 226 - TIO CANELA 75	-0.00340589	0.6371		-0.00880435	0.00199256	Fe
RCB 593 - SEF 60	-0.00168994	0.9977		-0.00727787	0.00389799	Fe
RCB 593 - SEF 71	-0.00304993	0.8168		-0.00863786	0.002538	Fe
RCB 593 - SEF 73	-0.00261801	0.9311		-0.00826234	0.00302633	Fe
RCB 593 - SEN 56	-0.00250584	0.9452		-0.00809377	0.00308209	Fe
RCB 593 - SXB 412	0.000117134	1		-0.0055881	0.00582237	Fe
RCB 593 - TIO CANELA 75	-0.00503591	0.1229		-0.0106238	0.000552018	Fe
SEF 60 - SEF 71	-0.00135999	0.9996		-0.00675845	0.00403846	Fe
SEF 60 - SEF 73	-0.000928063	1		-0.00638488	0.00452875	Fe
SEF 60 - SEN 56	-0.000815894	1		-0.00621435	0.00458256	Fe
SEF 60 - SXB 412	0.00180708	0.9953		-0.00371271	0.00732686	Fe
SEF 60 - TIO CANELA 75	-0.00334597	0.6629		-0.00874442	0.00205248	Fe
SEF 71 - SEF 73	0.000431928	1		-0.00502489	0.00588875	Fe
SEF 71 - SEN 56	0.000544097	1		-0.00485436	0.00594255	Fe
SEF 71 - SXB 412	0.00316707	0.7632		-0.00235271	0.00868685	Fe
SEF 71 - TIO CANELA 75	-0.00198598	0.9876		-0.00738443	0.00341248	Fe
SEF 73 - SEN 56	0.000112169	1		-0.00534465	0.00556899	Fe
SEF 73 - SXB 412	0.00273514	0.9014		-0.00284174	0.00831202	Fe
SEF 73 - TIO CANELA 75	-0.00241791	0.9495		-0.00787472	0.00303891	Fe
SEN 56 - SXB 412	0.00262297	0.9193		-0.00289681	0.00814275	Fe
SEN 56 - TIO CANELA 75	-0.00253008	0.9263		-0.00792853	0.00286838	Fe
SXB 412 - TIO CANELA 75	-0.00515305	0.093	.	-0.0106728	0.000366735	Fe
BFS 35 - BFS 81	-0.273415	1		-8.36044	7.81361	K
BFS 35 - CARIOCA	0.618391	1		-7.55607	8.79285	K
BFS 35 - DOR 390	-1.48839	1		-9.66285	6.68607	K
BFS 35 - NCB 226	-0.0858948	1		-8.17292	8.00113	K
BFS 35 - RCB 593	1.00582	1		-7.36505	9.37669	K
BFS 35 - SEF 60	-1.25802	1		-9.34505	6.82901	K
BFS 35 - SEF 71	0.388073	1		-7.69895	8.4751	K
BFS 35 - SEF 73	-2.73002	0.9944		-10.9045	5.44444	K
BFS 35 - SEN 56	0.818567	1		-7.26846	8.90559	K
BFS 35 - SXB 412	-2.46244	0.998		-10.7312	5.80634	K
BFS 35 - TIO CANELA 75	-1.71764	0.9999		-9.80466	6.36939	K
BFS 81 - CARIOCA	0.891806	1		-7.28265	9.06626	K
BFS 81 - DOR 390	-1.21498	1		-9.38944	6.95948	K
BFS 81 - NCB 226	0.18752	1		-7.89951	8.27455	K
BFS 81 - RCB 593	1.27924	1		-7.09163	9.6501	K
BFS 81 - SEF 60	-0.984607	1		-9.07164	7.10242	K
BFS 81 - SEF 71	0.661488	1		-7.42554	8.74852	K
BFS 81 - SEF 73	-2.45661	0.9978		-10.6311	5.71785	K
BFS 81 - SEN 56	1.09198	1		-6.99505	9.17901	K
BFS 81 - SXB 412	-2.18903	0.9993		-10.4578	6.07975	K
BFS 81 - TIO CANELA 75	-1.44422	1		-9.53125	6.64281	K
CARIOCA - DOR 390	-2.10678	0.9995		-10.3677	6.15418	K
CARIOCA - NCB 226	-0.704286	1		-8.87874	7.47017	K
CARIOCA - RCB 593	0.38743	1		-8.06793	8.8428	K
CARIOCA - SEF 60	-1.87641	0.9998		-10.0509	6.29804	K
CARIOCA - SEF 71	-0.230318	1		-8.40478	7.94414	K
CARIOCA - SEF 73	-3.34841	0.9735		-11.6094	4.91255	K
CARIOCA - SEN 56	0.200176	1		-7.97428	8.37463	K
CARIOCA - SXB 412	-3.08084	0.9873		-11.4351	5.27347	K
CARIOCA - TIO CANELA 75	-2.33603	0.9986		-10.5105	5.83843	K
DOR 390 - NCB 226	1.4025	1		-6.77196	9.57695	K
DOR 390 - RCB 593	2.49421	0.9981		-5.96115	10.9496	K
DOR 390 - SEF 60	0.23037	1		-7.94409	8.40483	K
DOR 390 - SEF 71	1.87647	0.9998		-6.29799	10.0509	K
DOR 390 - SEF 73	-1.24163	1		-9.50259	7.01933	K
DOR 390 - SEN 56	2.30696	0.9988		-5.8675	10.4814	K
DOR 390 - SXB 412	-0.974052	1		-9.32836	7.38026	K
DOR 390 - TIO CANELA 75	-0.229243	1		-8.4037	7.94521	K
NCB 226 - RCB 593	1.09172	1		-7.27915	9.46259	K
NCB 226 - SEF 60	-1.17213	1		-9.25915	6.9149	K
NCB 226 - SEF 71	0.473968	1		-7.61306	8.561	K
NCB 226 - SEF 73	-2.64413	0.9958		-10.8186	5.53033	K
NCB 226 - SEN 56	0.904462	1		-7.18257	8.99149	K
NCB 226 - SXB 412	-2.37655	0.9985		-10.6453	5.89223	K
NCB 226 - TIO CANELA 75	-1.63174	1		-9.71877	6.45529	K
RCB 593 - SEF 60	-2.26384	0.9992		-10.6347	6.10703	K
RCB 593 - SEF 71	-0.617749	1		-8.98862	7.75312	K
RCB 593 - SEF 73	-3.73584	0.9505		-12.1912	4.71952	K
RCB 593 - SEN 56	-0.187255	1		-8.55812	8.18361	K
RCB 593 - SXB 412	-3.46827	0.9733		-12.0149	5.07832	K
RCB 593 - TIO CANELA 75	-2.72346	0.9956		-11.0943	5.64741	K
SEF 60 - SEF 71	1.6461	0.9999		-6.44093	9.73312	K
SEF 60 - SEF 73	-1.472	1		-9.64646	6.70246	K
SEF 60 - SEN 56	2.07659	0.9995		-6.01044	10.1636	K
SEF 60 - SXB 412	-1.20442	1		-9.4732	7.06436	K
SEF 60 - TIO CANELA 75	-0.459613	1		-8.54664	7.62741	K
SEF 71 - SEF 73	-3.11809	0.9834		-11.2926	5.05636	K
SEF 71 - SEN 56	0.430494	1		-7.65653	8.51752	K
SEF 71 - SXB 412	-2.85052	0.9927		-11.1193	5.41826	K
SEF 71 - TIO CANELA 75	-2.10571	0.9994		-10.1927	5.98132	K
SEF 73 - SEN 56	3.54859	0.9563		-4.62587	11.723	K
SEF 73 - SXB 412	0.267576	1		-8.08673	8.62189	K
SEF 73 - TIO CANELA 75	1.01238	1		-7.16207	9.18684	K
SEN 56 - SXB 412	-3.28101	0.9775		-11.5498	4.98777	K
SEN 56 - TIO CANELA 75	-2.5362	0.9968		-10.6232	5.55082	K
SXB 412 - TIO CANELA 75	0.744809	1		-7.52397	9.01359	K
BFS 35 - BFS 81	0.296475	1		-2.35476	2.94771	Mg
BFS 35 - CARIOCA	0.498109	1		-2.18179	3.17801	Mg
BFS 35 - DOR 390	-0.115346	1		-2.79524	2.56455	Mg
BFS 35 - NCB 226	0.0896543	1		-2.56158	2.74089	Mg
BFS 35 - RCB 593	0.918343	0.9943		-1.82594	3.66263	Mg
BFS 35 - SEF 60	-0.194816	1		-2.84605	2.45642	Mg
BFS 35 - SEF 71	0.920995	0.9922		-1.73024	3.57223	Mg
BFS 35 - SEF 73	-0.519572	1		-3.19947	2.16032	Mg
BFS 35 - SEN 56	-0.141544	1		-2.79278	2.50969	Mg
BFS 35 - SXB 412	0.272418	1		-2.4384	2.98324	Mg
BFS 35 - TIO CANELA 75	0.364062	1		-2.28717	3.0153	Mg
BFS 81 - CARIOCA	0.201634	1		-2.47826	2.88153	Mg
BFS 81 - DOR 390	-0.411821	1		-3.09172	2.26808	Mg
BFS 81 - NCB 226	-0.206821	1		-2.85805	2.44441	Mg
BFS 81 - RCB 593	0.621868	0.9998		-2.12242	3.36616	Mg
BFS 81 - SEF 60	-0.491291	1		-3.14253	2.15994	Mg
BFS 81 - SEF 71	0.62452	0.9998		-2.02671	3.27575	Mg
BFS 81 - SEF 73	-0.816047	0.9975		-3.49594	1.86385	Mg
BFS 81 - SEN 56	-0.438019	1		-3.08925	2.21322	Mg
BFS 81 - SXB 412	-0.0240573	1		-2.73488	2.68676	Mg
BFS 81 - TIO CANELA 75	0.0675875	1		-2.58365	2.71882	Mg
CARIOCA - DOR 390	-0.613456	0.9998		-3.32171	2.0948	Mg
CARIOCA - NCB 226	-0.408455	1		-3.08835	2.27144	Mg
CARIOCA - RCB 593	0.420234	1		-2.35175	3.19222	Mg
CARIOCA - SEF 60	-0.692925	0.9994		-3.37282	1.98697	Mg
CARIOCA - SEF 71	0.422886	1		-2.25701	3.10278	Mg
CARIOCA - SEF 73	-1.01768	0.9853		-3.72594	1.69057	Mg
CARIOCA - SEN 56	-0.639653	0.9997		-3.31955	2.04024	Mg
CARIOCA - SXB 412	-0.225692	1		-2.96455	2.51317	Mg
CARIOCA - TIO CANELA 75	-0.134047	1		-2.81394	2.54585	Mg
DOR 390 - NCB 226	0.205001	1		-2.4749	2.8849	Mg
DOR 390 - RCB 593	1.03369	0.9861		-1.7383	3.80568	Mg
DOR 390 - SEF 60	-0.0794693	1		-2.75937	2.60043	Mg
DOR 390 - SEF 71	1.03634	0.9815		-1.64356	3.71624	Mg
DOR 390 - SEF 73	-0.404226	1		-3.11248	2.30403	Mg
DOR 390 - SEN 56	-0.0261972	1		-2.70609	2.6537	Mg
DOR 390 - SXB 412	0.387764	1		-2.3511	3.12662	Mg
DOR 390 - TIO CANELA 75	0.479409	1		-2.20049	3.15931	Mg
NCB 226 - RCB 593	0.828689	0.9977		-1.9156	3.57298	Mg
NCB 226 - SEF 60	-0.28447	1		-2.93571	2.36676	Mg
NCB 226 - SEF 71	0.831341	0.9968		-1.81989	3.48258	Mg
NCB 226 - SEF 73	-0.609227	0.9998		-3.28912	2.07067	Mg
NCB 226 - SEN 56	-0.231198	1		-2.88243	2.42004	Mg
NCB 226 - SXB 412	0.182763	1		-2.52806	2.89358	Mg
NCB 226 - TIO CANELA 75	0.274408	1		-2.37683	2.92564	Mg
RCB 593 - SEF 60	-1.11316	0.9734		-3.85745	1.63113	Mg
RCB 593 - SEF 71	0.00265153	1		-2.74164	2.74694	Mg
RCB 593 - SEF 73	-1.43792	0.862		-4.20991	1.33407	Mg
RCB 593 - SEN 56	-1.05989	0.9817		-3.80417	1.6844	Mg
RCB 593 - SXB 412	-0.645926	0.9998		-3.44782	2.15597	Mg
RCB 593 - TIO CANELA 75	-0.554281	1		-3.29857	2.19001	Mg
SEF 60 - SEF 71	1.11581	0.965		-1.53542	3.76704	Mg
SEF 60 - SEF 73	-0.324757	1		-3.00465	2.35514	Mg
SEF 60 - SEN 56	0.0532721	1		-2.59796	2.70451	Mg
SEF 60 - SXB 412	0.467233	1		-2.24359	3.17805	Mg
SEF 60 - TIO CANELA 75	0.558878	0.9999		-2.09236	3.21011	Mg
SEF 71 - SEF 73	-1.44057	0.8313		-4.12046	1.23933	Mg
SEF 71 - SEN 56	-1.06254	0.9757		-3.71377	1.5887	Mg
SEF 71 - SXB 412	-0.648577	0.9997		-3.3594	2.06224	Mg
SEF 71 - TIO CANELA 75	-0.556932	0.9999		-3.20817	2.0943	Mg
SEF 73 - SEN 56	0.378029	1		-2.30187	3.05793	Mg
SEF 73 - SXB 412	0.79199	0.9984		-1.94687	3.53085	Mg
SEF 73 - TIO CANELA 75	0.883635	0.995		-1.79626	3.56353	Mg
SEN 56 - SXB 412	0.413961	1		-2.29686	3.12478	Mg
SEN 56 - TIO CANELA 75	0.505606	1		-2.14563	3.15684	Mg
SXB 412 - TIO CANELA 75	0.0916449	1		-2.61917	2.80247	Mg
BFS 35 - BFS 81	0.138582	0.9994		-0.388631	0.665796	P
BFS 35 - CARIOCA	0.260424	0.9036		-0.272489	0.793338	P
BFS 35 - DOR 390	-0.00601187	1		-0.538925	0.526901	P
BFS 35 - NCB 226	-0.0848029	1		-0.612016	0.442411	P
BFS 35 - RCB 593	-0.0187243	1		-0.564442	0.526994	P
BFS 35 - SEF 60	0.0287953	1		-0.498418	0.556009	P
BFS 35 - SEF 71	0.28445	0.8279		-0.242763	0.811664	P
BFS 35 - SEF 73	0.039946	1		-0.492967	0.572859	P
BFS 35 - SEN 56	0.061432	1		-0.465782	0.588646	P
BFS 35 - SXB 412	-0.038755	1		-0.577817	0.500308	P
BFS 35 - TIO CANELA 75	0.232594	0.951		-0.29462	0.759807	P
BFS 81 - CARIOCA	0.121842	0.9998		-0.411071	0.654755	P
BFS 81 - DOR 390	-0.144594	0.9991		-0.677508	0.388319	P
BFS 81 - NCB 226	-0.223385	0.9633		-0.750599	0.303828	P
BFS 81 - RCB 593	-0.157307	0.9985		-0.703025	0.388411	P
BFS 81 - SEF 60	-0.109787	0.9999		-0.637001	0.417426	P
BFS 81 - SEF 71	0.145868	0.999		-0.381346	0.673081	P
BFS 81 - SEF 73	-0.0986365	1		-0.63155	0.434277	P
BFS 81 - SEN 56	-0.0771505	1		-0.604364	0.450063	P
BFS 81 - SXB 412	-0.177337	0.9951		-0.7164	0.361725	P
BFS 81 - TIO CANELA 75	0.0940112	1		-0.433202	0.621225	P
CARIOCA - DOR 390	-0.266436	0.896		-0.804989	0.272117	P
CARIOCA - NCB 226	-0.345227	0.5972		-0.87814	0.187686	P
CARIOCA - RCB 593	-0.279149	0.8802		-0.830375	0.272078	P
CARIOCA - SEF 60	-0.231629	0.9559		-0.764542	0.301284	P
CARIOCA - SEF 71	0.0240261	1		-0.508887	0.556939	P
CARIOCA - SEF 73	-0.220478	0.9715		-0.759031	0.318074	P
CARIOCA - SEN 56	-0.198992	0.986		-0.731905	0.333921	P
CARIOCA - SXB 412	-0.299179	0.8105		-0.843817	0.245459	P
CARIOCA - TIO CANELA 75	-0.0278306	1		-0.560744	0.505083	P
DOR 390 - NCB 226	-0.078791	1		-0.611704	0.454122	P
DOR 390 - RCB 593	-0.0127124	1		-0.563939	0.538514	P
DOR 390 - SEF 60	0.0348071	1		-0.498106	0.56772	P
DOR 390 - SEF 71	0.290462	0.8182		-0.242451	0.823375	P
DOR 390 - SEF 73	0.0459578	1		-0.492595	0.584511	P
DOR 390 - SEN 56	0.0674438	1		-0.465469	0.600357	P
DOR 390 - SXB 412	-0.0327431	1		-0.577381	0.511895	P
DOR 390 - TIO CANELA 75	0.238605	0.9457		-0.294308	0.771519	P
NCB 226 - RCB 593	0.0660786	1		-0.479639	0.611796	P
NCB 226 - SEF 60	0.113598	0.9999		-0.413615	0.640812	P
NCB 226 - SEF 71	0.369253	0.4724		-0.15796	0.896467	P
NCB 226 - SEF 73	0.124749	0.9998		-0.408164	0.657662	P
NCB 226 - SEN 56	0.146235	0.9989		-0.380979	0.673448	P
NCB 226 - SXB 412	0.0460479	1		-0.493015	0.58511	P
NCB 226 - TIO CANELA 75	0.317397	0.703		-0.209817	0.84461	P
RCB 593 - SEF 60	0.0475196	1		-0.498198	0.593237	P
RCB 593 - SEF 71	0.303175	0.7989		-0.242543	0.848892	P
RCB 593 - SEF 73	0.0586703	1		-0.492556	0.609897	P
RCB 593 - SEN 56	0.0801563	1		-0.465562	0.625874	P
RCB 593 - SXB 412	-0.0200307	1		-0.577204	0.537143	P
RCB 593 - TIO CANELA 75	0.251318	0.9343		-0.2944	0.797036	P
SEF 60 - SEF 71	0.255655	0.9082		-0.271558	0.782868	P
SEF 60 - SEF 73	0.0111507	1		-0.521763	0.544064	P
SEF 60 - SEN 56	0.0326367	1		-0.494577	0.55985	P
SEF 60 - SXB 412	-0.0675502	1		-0.606613	0.471512	P
SEF 60 - TIO CANELA 75	0.203798	0.9816		-0.323415	0.731012	P
SEF 71 - SEF 73	-0.244504	0.936		-0.777418	0.288409	P
SEF 71 - SEN 56	-0.223018	0.9637		-0.750232	0.304195	P
SEF 71 - SXB 412	-0.323205	0.7085		-0.862268	0.215857	P
SEF 71 - TIO CANELA 75	-0.0518566	1		-0.57907	0.475357	P
SEF 73 - SEN 56	0.021486	1		-0.511427	0.554399	P
SEF 73 - SXB 412	-0.0787009	1		-0.623339	0.465937	P
SEF 73 - TIO CANELA 75	0.192648	0.9892		-0.340266	0.725561	P
SEN 56 - SXB 412	-0.100187	1		-0.639249	0.438875	P
SEN 56 - TIO CANELA 75	0.171162	0.9956		-0.356052	0.698375	P
SXB 412 - TIO CANELA 75	0.271349	0.8844		-0.267714	0.810411	P
BFS 35 - BFS 81	0.0537918	1		-0.250863	0.358447	S
BFS 35 - CARIOCA	0.0275763	1		-0.280372	0.335525	S
BFS 35 - DOR 390	0.118356	0.9824		-0.189593	0.426305	S
BFS 35 - NCB 226	0.000614952	1		-0.30404	0.30527	S
BFS 35 - RCB 593	0.07895	0.9996		-0.236398	0.394298	S
BFS 35 - SEF 60	0.125609	0.9699		-0.179046	0.430264	S
BFS 35 - SEF 71	0.0772371	0.9995		-0.227418	0.381892	S
BFS 35 - SEF 73	0.0509884	1		-0.25696	0.358937	S
BFS 35 - SEN 56	0.121132	0.9771		-0.183523	0.425787	S
BFS 35 - SXB 412	0.10843	0.9921		-0.203072	0.419932	S
BFS 35 - TIO CANELA 75	0.147947	0.9073		-0.156708	0.452602	S
BFS 81 - CARIOCA	-0.0262155	1		-0.334164	0.281733	S
BFS 81 - DOR 390	0.0645641	0.9999		-0.243385	0.372513	S
BFS 81 - NCB 226	-0.0531768	1		-0.357832	0.251478	S
BFS 81 - RCB 593	0.0251582	1		-0.29019	0.340506	S
BFS 81 - SEF 60	0.0718173	0.9998		-0.232838	0.376472	S
BFS 81 - SEF 71	0.0234453	1		-0.28121	0.3281	S
BFS 81 - SEF 73	-0.00280344	1		-0.310752	0.305145	S
BFS 81 - SEN 56	0.0673398	0.9999		-0.237315	0.371995	S
BFS 81 - SXB 412	0.0546385	1		-0.256864	0.366141	S
BFS 81 - TIO CANELA 75	0.094155	0.9972		-0.2105	0.39881	S
CARIOCA - DOR 390	0.0907797	0.9983		-0.220428	0.401987	S
CARIOCA - NCB 226	-0.0269613	1		-0.33491	0.280987	S
CARIOCA - RCB 593	0.0513738	1		-0.267157	0.369905	S
CARIOCA - SEF 60	0.0980329	0.9963		-0.209916	0.405982	S
CARIOCA - SEF 71	0.0496608	1		-0.258288	0.35761	S
CARIOCA - SEF 73	0.0234121	1		-0.287795	0.33462	S
CARIOCA - SEN 56	0.0935554	0.9976		-0.214393	0.401504	S
CARIOCA - SXB 412	0.0808541	0.9995		-0.23387	0.395578	S
CARIOCA - TIO CANELA 75	0.120371	0.9799		-0.187578	0.428319	S
DOR 390 - NCB 226	-0.117741	0.9831		-0.42569	0.190208	S
DOR 390 - RCB 593	-0.0394059	1		-0.357937	0.279125	S
DOR 390 - SEF 60	0.0072532	1		-0.300696	0.315202	S
DOR 390 - SEF 71	-0.0411188	1		-0.349067	0.26683	S
DOR 390 - SEF 73	-0.0673676	0.9999		-0.378575	0.24384	S
DOR 390 - SEN 56	0.00277568	1		-0.305173	0.310724	S
DOR 390 - SXB 412	-0.00992559	1		-0.32465	0.304798	S
DOR 390 - TIO CANELA 75	0.0295909	1		-0.278358	0.33754	S
NCB 226 - RCB 593	0.0783351	0.9996		-0.237013	0.393683	S
NCB 226 - SEF 60	0.124994	0.971		-0.179661	0.429649	S
NCB 226 - SEF 71	0.0766221	0.9996		-0.228033	0.381277	S
NCB 226 - SEF 73	0.0503734	1		-0.257575	0.358322	S
NCB 226 - SEN 56	0.120517	0.978		-0.184138	0.425172	S
NCB 226 - SXB 412	0.107815	0.9925		-0.203687	0.419318	S
NCB 226 - TIO CANELA 75	0.147332	0.9097		-0.157323	0.451987	S
RCB 593 - SEF 60	0.0466591	1		-0.268689	0.362007	S
RCB 593 - SEF 71	-0.00171294	1		-0.317061	0.313635	S
RCB 593 - SEF 73	-0.0279617	1		-0.346493	0.290569	S
RCB 593 - SEN 56	0.0421816	1		-0.273166	0.35753	S
RCB 593 - SXB 412	0.0294803	1		-0.292487	0.351448	S
RCB 593 - TIO CANELA 75	0.0689968	0.9999		-0.246351	0.384345	S
SEF 60 - SEF 71	-0.048372	1		-0.353027	0.256283	S
SEF 60 - SEF 73	-0.0746208	0.9997		-0.38257	0.233328	S
SEF 60 - SEN 56	-0.00447751	1		-0.309132	0.300177	S
SEF 60 - SXB 412	-0.0171788	1		-0.328681	0.294323	S
SEF 60 - TIO CANELA 75	0.0223377	1		-0.282317	0.326993	S
SEF 71 - SEF 73	-0.0262487	1		-0.334197	0.2817	S
SEF 71 - SEN 56	0.0438945	1		-0.260761	0.34855	S
SEF 71 - SXB 412	0.0311933	1		-0.280309	0.342695	S
SEF 71 - TIO CANELA 75	0.0707097	0.9998		-0.233945	0.375365	S
SEF 73 - SEN 56	0.0701432	0.9998		-0.237805	0.378092	S
SEF 73 - SXB 412	0.057442	1		-0.257282	0.372166	S
SEF 73 - TIO CANELA 75	0.0969584	0.9967		-0.21099	0.404907	S
SEN 56 - SXB 412	-0.0127013	1		-0.324203	0.298801	S
SEN 56 - TIO CANELA 75	0.0268152	1		-0.27784	0.33147	S
SXB 412 - TIO CANELA 75	0.0395164	1		-0.271986	0.351019	S
BFS 35 - BFS 81	9.28603e-06	1		-0.00613779	0.00615636	Zn
BFS 35 - CARIOCA	-0.00150146	0.9997		-0.00771499	0.00471207	Zn
BFS 35 - DOR 390	-0.00319643	0.8685		-0.00940995	0.0030171	Zn
BFS 35 - NCB 226	-0.00207946	0.9938		-0.00822654	0.00406761	Zn
BFS 35 - RCB 593	0.00229226	0.9895		-0.00407056	0.00865508	Zn
BFS 35 - SEF 60	0.00124601	0.9999		-0.00490106	0.00739308	Zn
BFS 35 - SEF 71	0.00383768	0.6525		-0.0023094	0.00998475	Zn
BFS 35 - SEF 73	-0.00101832	1		-0.00723185	0.0051952	Zn
BFS 35 - SEN 56	-0.000299301	1		-0.00644637	0.00584777	Zn
BFS 35 - SXB 412	-0.000605134	1		-0.00689036	0.00568009	Zn
BFS 35 - TIO CANELA 75	0.00125422	0.9999		-0.00489285	0.00740129	Zn
BFS 81 - CARIOCA	-0.00151075	0.9997		-0.00772428	0.00470278	Zn
BFS 81 - DOR 390	-0.00320571	0.8663		-0.00941924	0.00300782	Zn
BFS 81 - NCB 226	-0.00208875	0.9936		-0.00823582	0.00405832	Zn
BFS 81 - RCB 593	0.00228298	0.9899		-0.00407985	0.0086458	Zn
BFS 81 - SEF 60	0.00123672	1		-0.00491035	0.0073838	Zn
BFS 81 - SEF 71	0.00382839	0.656		-0.00231868	0.00997546	Zn
BFS 81 - SEF 73	-0.00102761	1		-0.00724114	0.00518592	Zn
BFS 81 - SEN 56	-0.000308587	1		-0.00645566	0.00583849	Zn
BFS 81 - SXB 412	-0.00061442	1		-0.00689965	0.00567081	Zn
BFS 81 - TIO CANELA 75	0.00124494	0.9999		-0.00490214	0.00739201	Zn
CARIOCA - DOR 390	-0.00169497	0.9992		-0.00797425	0.00458432	Zn
CARIOCA - NCB 226	-0.000578004	1		-0.00679153	0.00563552	Zn
CARIOCA - RCB 593	0.00379372	0.7287		-0.00263333	0.0102208	Zn
CARIOCA - SEF 60	0.00274747	0.9502		-0.00346606	0.008961	Zn
CARIOCA - SEF 71	0.00533914	0.1722		-0.000874393	0.0115527	Zn
CARIOCA - SEF 73	0.000483137	1		-0.00579614	0.00676242	Zn
CARIOCA - SEN 56	0.00120216	1		-0.00501137	0.00741569	Zn
CARIOCA - SXB 412	0.000896327	1		-0.00545391	0.00724656	Zn
CARIOCA - TIO CANELA 75	0.00275568	0.9492		-0.00345785	0.00896921	Zn
DOR 390 - NCB 226	0.00111696	1		-0.00509657	0.00733049	Zn
DOR 390 - RCB 593	0.00548869	0.1793		-0.000938363	0.0119157	Zn
DOR 390 - SEF 60	0.00444244	0.4387		-0.00177109	0.010656	Zn
DOR 390 - SEF 71	0.0070341	0.0122	*	0.000820572	0.0132476	Zn
DOR 390 - SEF 73	0.0021781	0.9923		-0.00410118	0.00845738	Zn
DOR 390 - SEN 56	0.00289712	0.9287		-0.0033164	0.00911065	Zn
DOR 390 - SXB 412	0.00259129	0.9722		-0.00375895	0.00894153	Zn
DOR 390 - TIO CANELA 75	0.00445065	0.4357		-0.00176288	0.0106642	Zn
NCB 226 - RCB 593	0.00437173	0.5037		-0.0019911	0.0107346	Zn
NCB 226 - SEF 60	0.00332548	0.8254		-0.0028216	0.00947255	Zn
NCB 226 - SEF 71	0.00591714	0.0715	.	-0.000229932	0.0120642	Zn
NCB 226 - SEF 73	0.00106114	1		-0.00515239	0.00727467	Zn
NCB 226 - SEN 56	0.00178016	0.9984		-0.00436691	0.00792724	Zn
NCB 226 - SXB 412	0.00147433	0.9998		-0.00481089	0.00775956	Zn
NCB 226 - TIO CANELA 75	0.00333369	0.823		-0.00281338	0.00948076	Zn
RCB 593 - SEF 60	-0.00104625	1		-0.00740907	0.00531657	Zn
RCB 593 - SEF 71	0.00154541	0.9997		-0.00481741	0.00790824	Zn
RCB 593 - SEF 73	-0.00331059	0.8675		-0.00973763	0.00311647	Zn
RCB 593 - SEN 56	-0.00259156	0.9725		-0.00895439	0.00377126	Zn
RCB 593 - SXB 412	-0.0028974	0.9472		-0.00939379	0.00359899	Zn
RCB 593 - TIO CANELA 75	-0.00103804	1		-0.00740086	0.00532478	Zn
SEF 60 - SEF 71	0.00259166	0.9646		-0.00355541	0.00873873	Zn
SEF 60 - SEF 73	-0.00226434	0.9885		-0.00847786	0.00394919	Zn
SEF 60 - SEN 56	-0.00154531	0.9996		-0.00769238	0.00460176	Zn
SEF 60 - SXB 412	-0.00185115	0.9982		-0.00813637	0.00443408	Zn
SEF 60 - TIO CANELA 75	8.21043e-06	1		-0.00613886	0.00615528	Zn
SEF 71 - SEF 73	-0.004856	0.2981		-0.0110695	0.00135753	Zn
SEF 71 - SEN 56	-0.00413698	0.5372		-0.010284	0.0020101	Zn
SEF 71 - SXB 412	-0.00444281	0.4573		-0.010728	0.00184242	Zn
SEF 71 - TIO CANELA 75	-0.00258345	0.9654		-0.00873052	0.00356362	Zn
SEF 73 - SEN 56	0.000719023	1		-0.00549451	0.00693255	Zn
SEF 73 - SXB 412	0.000413189	1		-0.00593705	0.00676343	Zn
SEF 73 - TIO CANELA 75	0.00227255	0.9881		-0.00394098	0.00848607	Zn
SEN 56 - SXB 412	-0.000305834	1		-0.00659106	0.00597939	Zn
SEN 56 - TIO CANELA 75	0.00155352	0.9996		-0.00459355	0.00770059	Zn
SXB 412 - TIO CANELA 75	0.00185936	0.9981		-0.00442587	0.00814458	Zn
Line means adjusted for treatment and stage and analysed according to minerals
HSD test at ɑ = 0.05

## Sheet: SupTable9
Supplementary Table 9. Multiple comparison between lines on the concentration of minerals in the seed
Line Comparison	Difference	Pvalue	signif.	LCL	UCL	Minerals
BFS 35 - BFS 81	0.0801248	0.9995		-0.238432	0.398681	Ca
BFS 35 - CARIOCA	0.0578748	1		-0.267841	0.383591	Ca
BFS 35 - DOR 390	0.128349	0.9759		-0.197367	0.454065	Ca
BFS 35 - NCB 226	0.116154	0.9868		-0.202403	0.43471	Ca
BFS 35 - RCB 593	0.203298	0.6377		-0.122418	0.529013	Ca
BFS 35 - SEF 60	0.133394	0.9623		-0.185162	0.451951	Ca
BFS 35 - SEF 71	0.270658	0.1803		-0.047898	0.589215	Ca
BFS 35 - SEF 73	0.185567	0.7578		-0.140149	0.511283	Ca
BFS 35 - SEN 56	0.0286055	1		-0.29711	0.354321	Ca
BFS 35 - SXB 412	0.206716	0.6503		-0.127389	0.540821	Ca
BFS 35 - TIO CANELA 75	0.12263	0.9798		-0.195927	0.441186	Ca
BFS 81 - CARIOCA	-0.02225	1		-0.347966	0.303466	Ca
BFS 81 - DOR 390	0.0482244	1		-0.277491	0.37394	Ca
BFS 81 - NCB 226	0.0360289	1		-0.282527	0.354585	Ca
BFS 81 - RCB 593	0.123173	0.9824		-0.202543	0.448889	Ca
BFS 81 - SEF 60	0.0532695	1		-0.265287	0.371826	Ca
BFS 81 - SEF 71	0.190534	0.697		-0.128023	0.50909	Ca
BFS 81 - SEF 73	0.105442	0.9951		-0.220274	0.431158	Ca
BFS 81 - SEN 56	-0.0515193	1		-0.377235	0.274197	Ca
BFS 81 - SXB 412	0.126591	0.9822		-0.207513	0.460696	Ca
BFS 81 - TIO CANELA 75	0.042505	1		-0.276051	0.361061	Ca
CARIOCA - DOR 390	0.0704744	0.9999		-0.262247	0.403196	Ca
CARIOCA - NCB 226	0.0582789	1		-0.267437	0.383995	Ca
CARIOCA - RCB 593	0.145423	0.9491		-0.187299	0.478144	Ca
CARIOCA - SEF 60	0.0755195	0.9998		-0.250196	0.401235	Ca
CARIOCA - SEF 71	0.212784	0.5692		-0.112932	0.538499	Ca
CARIOCA - SEF 73	0.127692	0.9803		-0.205029	0.460414	Ca
CARIOCA - SEN 56	-0.0292693	1		-0.361991	0.303452	Ca
CARIOCA - SXB 412	0.148841	0.9495		-0.192096	0.489779	Ca
CARIOCA - TIO CANELA 75	0.064755	0.9999		-0.260961	0.390471	Ca
DOR 390 - NCB 226	-0.0121955	1		-0.337911	0.31352	Ca
DOR 390 - RCB 593	0.0749484	0.9998		-0.257773	0.40767	Ca
DOR 390 - SEF 60	0.0050451	1		-0.320671	0.330761	Ca
DOR 390 - SEF 71	0.142309	0.9493		-0.183407	0.468025	Ca
DOR 390 - SEF 73	0.0572178	1		-0.275503	0.389939	Ca
DOR 390 - SEN 56	-0.0997437	0.9975		-0.432465	0.232978	Ca
DOR 390 - SXB 412	0.078367	0.9998		-0.262571	0.419305	Ca
DOR 390 - TIO CANELA 75	-0.00571942	1		-0.331435	0.319996	Ca
NCB 226 - RCB 593	0.0871439	0.9991		-0.238572	0.41286	Ca
NCB 226 - SEF 60	0.0172406	1		-0.301316	0.335797	Ca
NCB 226 - SEF 71	0.154505	0.8998		-0.164052	0.473061	Ca
NCB 226 - SEF 73	0.0694133	0.9999		-0.256303	0.395129	Ca
NCB 226 - SEN 56	-0.0875482	0.9991		-0.413264	0.238168	Ca
NCB 226 - SXB 412	0.0905625	0.999		-0.243542	0.424667	Ca
NCB 226 - TIO CANELA 75	0.00647608	1		-0.31208	0.325032	Ca
RCB 593 - SEF 60	-0.0699033	0.9999		-0.395619	0.255813	Ca
RCB 593 - SEF 71	0.0673608	0.9999		-0.258355	0.393077	Ca
RCB 593 - SEF 73	-0.0177305	1		-0.350452	0.314991	Ca
RCB 593 - SEN 56	-0.174692	0.8411		-0.507413	0.158029	Ca
RCB 593 - SXB 412	0.00341864	1		-0.337519	0.344357	Ca
RCB 593 - TIO CANELA 75	-0.0806678	0.9996		-0.406384	0.245048	Ca
SEF 60 - SEF 71	0.137264	0.9539		-0.181292	0.45582	Ca
SEF 60 - SEF 73	0.0521727	1		-0.273543	0.377889	Ca
SEF 60 - SEN 56	-0.104789	0.9953		-0.430505	0.220927	Ca
SEF 60 - SXB 412	0.0733219	0.9999		-0.260783	0.407427	Ca
SEF 60 - TIO CANELA 75	-0.0107645	1		-0.329321	0.307792	Ca
SEF 71 - SEF 73	-0.0850913	0.9993		-0.410807	0.240625	Ca
SEF 71 - SEN 56	-0.242053	0.3647		-0.567769	0.083663	Ca
SEF 71 - SXB 412	-0.0639421	1		-0.398047	0.270163	Ca
SEF 71 - TIO CANELA 75	-0.148029	0.9235		-0.466585	0.170528	Ca
SEF 73 - SEN 56	-0.156962	0.9157		-0.489683	0.17576	Ca
SEF 73 - SXB 412	0.0211492	1		-0.319789	0.362087	Ca
SEF 73 - TIO CANELA 75	-0.0629372	1		-0.388653	0.262779	Ca
SEN 56 - SXB 412	0.178111	0.8454		-0.162827	0.519049	Ca
SEN 56 - TIO CANELA 75	0.0940243	0.9982		-0.231692	0.41974	Ca
SXB 412 - TIO CANELA 75	-0.0840864	0.9995		-0.418191	0.250018	Ca
BFS 35 - BFS 81	0.0196249	0.8773		-0.0194818	0.0587315	Fe
BFS 35 - CARIOCA	0.00984694	0.9996		-0.0301386	0.0498325	Fe
BFS 35 - DOR 390	-0.00918534	0.9998		-0.0491709	0.0308002	Fe
BFS 35 - NCB 226	0.0188956	0.9023		-0.0202111	0.0580022	Fe
BFS 35 - RCB 593	0.0209028	0.8251		-0.0182039	0.0600094	Fe
BFS 35 - SEF 60	0.0227028	0.7355		-0.0164039	0.0618094	Fe
BFS 35 - SEF 71	0.0136574	0.9907		-0.0254493	0.052764	Fe
BFS 35 - SEF 73	0.0139259	0.9909		-0.0260596	0.0539115	Fe
BFS 35 - SEN 56	0.0087331	0.9999		-0.0312525	0.0487187	Fe
BFS 35 - SXB 412	0.0262592	0.6003		-0.0147562	0.0672746	Fe
BFS 35 - TIO CANELA 75	0.02049	0.8431		-0.0186166	0.0595967	Fe
BFS 81 - CARIOCA	-0.00977794	0.9996		-0.0497635	0.0302076	Fe
BFS 81 - DOR 390	-0.0288102	0.4136		-0.0687958	0.0111753	Fe
BFS 81 - NCB 226	-0.000729287	1		-0.0398359	0.0383773	Fe
BFS 81 - RCB 593	0.00127791	1		-0.0378287	0.0403845	Fe
BFS 81 - SEF 60	0.00307789	1		-0.0360287	0.0421845	Fe
BFS 81 - SEF 71	-0.00596751	1		-0.0450741	0.0331391	Fe
BFS 81 - SEF 73	-0.00569896	1		-0.0456845	0.0342866	Fe
BFS 81 - SEN 56	-0.0108918	0.9989		-0.0508773	0.0290938	Fe
BFS 81 - SXB 412	0.00663435	1		-0.034381	0.0476497	Fe
BFS 81 - TIO CANELA 75	0.000865163	1		-0.0382415	0.0399718	Fe
CARIOCA - DOR 390	-0.0190323	0.9222		-0.0598778	0.0218133	Fe
CARIOCA - NCB 226	0.00904865	0.9998		-0.0309369	0.0490342	Fe
CARIOCA - RCB 593	0.0110559	0.9988		-0.0289297	0.0510414	Fe
CARIOCA - SEF 60	0.0128558	0.9954		-0.0271297	0.0528414	Fe
CARIOCA - SEF 71	0.00381043	1		-0.0361751	0.043796	Fe
CARIOCA - SEF 73	0.00407897	1		-0.0367666	0.0449245	Fe
CARIOCA - SEN 56	-0.00111384	1		-0.0419594	0.0397317	Fe
CARIOCA - SXB 412	0.0164123	0.9768		-0.0254419	0.0582665	Fe
CARIOCA - TIO CANELA 75	0.0106431	0.9991		-0.0293425	0.0506286	Fe
DOR 390 - NCB 226	0.0280809	0.4546		-0.0119046	0.0680665	Fe
DOR 390 - RCB 593	0.0300881	0.3456		-0.00989742	0.0700737	Fe
DOR 390 - SEF 60	0.0318881	0.2606		-0.00809744	0.0718737	Fe
DOR 390 - SEF 71	0.0228427	0.7548		-0.0171428	0.0628283	Fe
DOR 390 - SEF 73	0.0231113	0.7659		-0.0177343	0.0639568	Fe
DOR 390 - SEN 56	0.0179184	0.9479		-0.0229271	0.058764	Fe
DOR 390 - SXB 412	0.0354446	0.1841		-0.00640966	0.0772988	Fe
DOR 390 - TIO CANELA 75	0.0296754	0.3669		-0.0103102	0.0696609	Fe
NCB 226 - RCB 593	0.0020072	1		-0.0370994	0.0411138	Fe
NCB 226 - SEF 60	0.00380718	1		-0.0352995	0.0429138	Fe
NCB 226 - SEF 71	-0.00523822	1		-0.0443449	0.0338684	Fe
NCB 226 - SEF 73	-0.00496968	1		-0.0449552	0.0350159	Fe
NCB 226 - SEN 56	-0.0101625	0.9994		-0.050148	0.0298231	Fe
NCB 226 - SXB 412	0.00736364	1		-0.0336518	0.048379	Fe
NCB 226 - TIO CANELA 75	0.00159445	1		-0.0375122	0.0407011	Fe
RCB 593 - SEF 60	0.00179998	1		-0.0373067	0.0409066	Fe
RCB 593 - SEF 71	-0.00724542	1		-0.0463521	0.0318612	Fe
RCB 593 - SEF 73	-0.00697688	1		-0.0469624	0.0330087	Fe
RCB 593 - SEN 56	-0.0121697	0.9971		-0.0521552	0.0278159	Fe
RCB 593 - SXB 412	0.00535644	1		-0.035659	0.0463718	Fe
RCB 593 - TIO CANELA 75	-0.00041275	1		-0.0395194	0.0386939	Fe
SEF 60 - SEF 71	-0.0090454	0.9998		-0.048152	0.0300612	Fe
SEF 60 - SEF 73	-0.00877686	0.9999		-0.0487624	0.0312087	Fe
SEF 60 - SEN 56	-0.0139697	0.9907		-0.0539552	0.0260159	Fe
SEF 60 - SXB 412	0.00355646	1		-0.0374589	0.0445719	Fe
SEF 60 - TIO CANELA 75	-0.00221273	1		-0.0413194	0.0368939	Fe
SEF 71 - SEF 73	0.000268545	1		-0.039717	0.0402541	Fe
SEF 71 - SEN 56	-0.00492427	1		-0.0449098	0.0350613	Fe
SEF 71 - SXB 412	0.0126019	0.9969		-0.0284135	0.0536172	Fe
SEF 71 - TIO CANELA 75	0.00683267	1		-0.032274	0.0459393	Fe
SEF 73 - SEN 56	-0.00519281	1		-0.0460384	0.0356527	Fe
SEF 73 - SXB 412	0.0123333	0.9978		-0.0295209	0.0541876	Fe
SEF 73 - TIO CANELA 75	0.00656413	1		-0.0334214	0.0465497	Fe
SEN 56 - SXB 412	0.0175261	0.9624		-0.0243281	0.0593804	Fe
SEN 56 - TIO CANELA 75	0.0117569	0.9979		-0.0282286	0.0517425	Fe
SXB 412 - TIO CANELA 75	-0.00576919	1		-0.0467846	0.0352462	Fe
BFS 35 - BFS 81	0.0848084	1		-1.21325	1.38287	K
BFS 35 - CARIOCA	0.817345	0.6572		-0.509891	2.14458	K
BFS 35 - DOR 390	0.162926	1		-1.16431	1.49016	K
BFS 35 - NCB 226	0.794272	0.6662		-0.503791	2.09233	K
BFS 35 - RCB 593	0.487234	0.9834		-0.810828	1.7853	K
BFS 35 - SEF 60	0.401838	0.9967		-0.896224	1.6999	K
BFS 35 - SEF 71	0.264976	0.9999		-1.03309	1.56304	K
BFS 35 - SEF 73	0.934097	0.4512		-0.393139	2.26133	K
BFS 35 - SEN 56	-0.0765855	1		-1.40382	1.25065	K
BFS 35 - SXB 412	1.19836	0.1426		-0.163061	2.55978	K
BFS 35 - TIO CANELA 75	0.879708	0.5117		-0.418354	2.17777	K
BFS 81 - CARIOCA	0.732536	0.7932		-0.5947	2.05977	K
BFS 81 - DOR 390	0.0781172	1		-1.24912	1.40535	K
BFS 81 - NCB 226	0.709463	0.8033		-0.588599	2.00753	K
BFS 81 - RCB 593	0.402426	0.9966		-0.895637	1.70049	K
BFS 81 - SEF 60	0.31703	0.9996		-0.981033	1.61509	K
BFS 81 - SEF 71	0.180167	1		-1.1179	1.47823	K
BFS 81 - SEF 73	0.849288	0.6011		-0.477948	2.17652	K
BFS 81 - SEN 56	-0.161394	1		-1.48863	1.16584	K
BFS 81 - SXB 412	1.11355	0.2267		-0.247869	2.47497	K
BFS 81 - TIO CANELA 75	0.7949	0.6651		-0.503163	2.09296	K
CARIOCA - DOR 390	-0.654419	0.9029		-2.0102	0.701363	K
CARIOCA - NCB 226	-0.0230731	1		-1.35031	1.30416	K
CARIOCA - RCB 593	-0.330111	0.9995		-1.65735	0.997125	K
CARIOCA - SEF 60	-0.415507	0.9963		-1.74274	0.911729	K
CARIOCA - SEF 71	-0.552369	0.964		-1.87961	0.774867	K
CARIOCA - SEF 73	0.116752	1		-1.23903	1.47253	K
CARIOCA - SEN 56	-0.89393	0.5551		-2.24971	0.461852	K
CARIOCA - SXB 412	0.381014	0.9989		-1.00825	1.77028	K
CARIOCA - TIO CANELA 75	0.0623634	1		-1.26487	1.3896	K
DOR 390 - NCB 226	0.631346	0.9113		-0.69589	1.95858	K
DOR 390 - RCB 593	0.324308	0.9996		-1.00293	1.65154	K
DOR 390 - SEF 60	0.238912	1		-1.08832	1.56615	K
DOR 390 - SEF 71	0.10205	1		-1.22519	1.42929	K
DOR 390 - SEF 73	0.771171	0.7599		-0.584611	2.12695	K
DOR 390 - SEN 56	-0.239511	1		-1.59529	1.11627	K
DOR 390 - SXB 412	1.03543	0.3603		-0.35383	2.4247	K
DOR 390 - TIO CANELA 75	0.716783	0.8152		-0.610453	2.04402	K
NCB 226 - RCB 593	-0.307038	0.9997		-1.6051	0.991025	K
NCB 226 - SEF 60	-0.392434	0.9973		-1.6905	0.905629	K
NCB 226 - SEF 71	-0.529296	0.969		-1.82736	0.768766	K
NCB 226 - SEF 73	0.139825	1		-1.18741	1.46706	K
NCB 226 - SEN 56	-0.870857	0.5627		-2.19809	0.456379	K
NCB 226 - SXB 412	0.404087	0.9977		-0.957332	1.76551	K
NCB 226 - TIO CANELA 75	0.0854365	1		-1.21263	1.3835	K
RCB 593 - SEF 60	-0.085396	1		-1.38346	1.21267	K
RCB 593 - SEF 71	-0.222259	1		-1.52032	1.0758	K
RCB 593 - SEF 73	0.446863	0.9931		-0.880373	1.7741	K
RCB 593 - SEN 56	-0.56382	0.9584		-1.89106	0.763416	K
RCB 593 - SXB 412	0.711125	0.8457		-0.650295	2.07254	K
RCB 593 - TIO CANELA 75	0.392474	0.9973		-0.905588	1.69054	K
SEF 60 - SEF 71	-0.136863	1		-1.43493	1.1612	K
SEF 60 - SEF 73	0.532259	0.9726		-0.794977	1.85949	K
SEF 60 - SEN 56	-0.478424	0.988		-1.80566	0.848812	K
SEF 60 - SXB 412	0.796521	0.7258		-0.564899	2.15794	K
SEF 60 - TIO CANELA 75	0.47787	0.9858		-0.820192	1.77593	K
SEF 71 - SEF 73	0.669121	0.8739		-0.658115	1.99636	K
SEF 71 - SEN 56	-0.341561	0.9994		-1.6688	0.985675	K
SEF 71 - SXB 412	0.933383	0.4932		-0.428036	2.2948	K
SEF 71 - TIO CANELA 75	0.614733	0.9138		-0.68333	1.9128	K
SEF 73 - SEN 56	-1.01068	0.36		-2.36646	0.3451	K
SEF 73 - SXB 412	0.264262	1		-1.125	1.65352	K
SEF 73 - TIO CANELA 75	-0.0543887	1		-1.38162	1.27285	K
SEN 56 - SXB 412	1.27494	0.1049		-0.114319	2.66421	K
SEN 56 - TIO CANELA 75	0.956294	0.4136		-0.370942	2.28353	K
SXB 412 - TIO CANELA 75	-0.318651	0.9997		-1.68007	1.04277	K
BFS 35 - BFS 81	0.0218423	1		-0.205843	0.249528	Mg
BFS 35 - CARIOCA	0.121352	0.8475		-0.111451	0.354155	Mg
BFS 35 - DOR 390	0.0641433	0.9988		-0.16866	0.296946	Mg
BFS 35 - NCB 226	0.167735	0.3785		-0.0599505	0.395421	Mg
BFS 35 - RCB 593	0.131785	0.7391		-0.0959009	0.35947	Mg
BFS 35 - SEF 60	0.0997146	0.9485		-0.127971	0.3274	Mg
BFS 35 - SEF 71	0.123646	0.8098		-0.10404	0.351332	Mg
BFS 35 - SEF 73	0.212559	0.1091		-0.0202443	0.445361	Mg
BFS 35 - SEN 56	-0.0146967	1		-0.2475	0.218106	Mg
BFS 35 - SXB 412	0.190969	0.2568		-0.0478299	0.429768	Mg
BFS 35 - TIO CANELA 75	0.181143	0.2639		-0.0465431	0.408828	Mg
BFS 81 - CARIOCA	0.0995097	0.9565		-0.133293	0.332313	Mg
BFS 81 - DOR 390	0.042301	1		-0.190502	0.275104	Mg
BFS 81 - NCB 226	0.145893	0.599		-0.0817927	0.373579	Mg
BFS 81 - RCB 593	0.109942	0.9026		-0.117743	0.337628	Mg
BFS 81 - SEF 60	0.0778723	0.9922		-0.149813	0.305558	Mg
BFS 81 - SEF 71	0.101804	0.9407		-0.125882	0.329489	Mg
BFS 81 - SEF 73	0.190716	0.2247		-0.0420865	0.423519	Mg
BFS 81 - SEN 56	-0.036539	1		-0.269342	0.196264	Mg
BFS 81 - SXB 412	0.169127	0.4411		-0.0696722	0.407925	Mg
BFS 81 - TIO CANELA 75	0.1593	0.4607		-0.0683853	0.386986	Mg
CARIOCA - DOR 390	-0.0572087	0.9997		-0.295019	0.180601	Mg
CARIOCA - NCB 226	0.0463831	0.9999		-0.18642	0.279186	Mg
CARIOCA - RCB 593	0.0104327	1		-0.22237	0.243235	Mg
CARIOCA - SEF 60	-0.0216374	1		-0.25444	0.211165	Mg
CARIOCA - SEF 71	0.00229391	1		-0.230509	0.235097	Mg
CARIOCA - SEF 73	0.0912065	0.9804		-0.146603	0.329016	Mg
CARIOCA - SEN 56	-0.136049	0.7531		-0.373859	0.101761	Mg
CARIOCA - SXB 412	0.0696168	0.9984		-0.174066	0.313299	Mg
CARIOCA - TIO CANELA 75	0.0597906	0.9994		-0.173012	0.292593	Mg
DOR 390 - NCB 226	0.103592	0.9426		-0.129211	0.336395	Mg
DOR 390 - RCB 593	0.0676414	0.9981		-0.165161	0.300444	Mg
DOR 390 - SEF 60	0.0355713	1		-0.197231	0.268374	Mg
DOR 390 - SEF 71	0.0595027	0.9994		-0.1733	0.292305	Mg
DOR 390 - SEF 73	0.148415	0.6381		-0.0893946	0.386225	Mg
DOR 390 - SEN 56	-0.07884	0.994		-0.31665	0.15897	Mg
DOR 390 - SXB 412	0.126826	0.8488		-0.116857	0.370508	Mg
DOR 390 - TIO CANELA 75	0.116999	0.8762		-0.115803	0.349802	Mg
NCB 226 - RCB 593	-0.0359505	1		-0.263636	0.191735	Mg
NCB 226 - SEF 60	-0.0680205	0.9976		-0.295706	0.159665	Mg
NCB 226 - SEF 71	-0.0440892	1		-0.271775	0.183596	Mg
NCB 226 - SEF 73	0.0448234	1		-0.187979	0.277626	Mg
NCB 226 - SEN 56	-0.182432	0.2853		-0.415235	0.0503709	Mg
NCB 226 - SXB 412	0.0232337	1		-0.215565	0.262032	Mg
NCB 226 - TIO CANELA 75	0.0134074	1		-0.214278	0.241093	Mg
RCB 593 - SEF 60	-0.0320701	1		-0.259756	0.195616	Mg
RCB 593 - SEF 71	-0.00813878	1		-0.235824	0.219547	Mg
RCB 593 - SEF 73	0.0807738	0.9912		-0.152029	0.313577	Mg
RCB 593 - SEN 56	-0.146481	0.6262		-0.379284	0.0863214	Mg
RCB 593 - SXB 412	0.0591841	0.9996		-0.179615	0.297983	Mg
RCB 593 - TIO CANELA 75	0.0493579	0.9999		-0.178328	0.277044	Mg
SEF 60 - SEF 71	0.0239313	1		-0.203754	0.251617	Mg
SEF 60 - SEF 73	0.112844	0.9003		-0.119959	0.345647	Mg
SEF 60 - SEN 56	-0.114411	0.8916		-0.347214	0.118391	Mg
SEF 60 - SXB 412	0.0912542	0.981		-0.147545	0.330053	Mg
SEF 60 - TIO CANELA 75	0.081428	0.9887		-0.146258	0.309114	Mg
SEF 71 - SEF 73	0.0889126	0.9811		-0.14389	0.321715	Mg
SEF 71 - SEN 56	-0.138343	0.7058		-0.371145	0.0944602	Mg
SEF 71 - SXB 412	0.0673229	0.9985		-0.171476	0.306122	Mg
SEF 71 - TIO CANELA 75	0.0574967	0.9995		-0.170189	0.285182	Mg
SEF 73 - SEN 56	-0.227255	0.0754	.	-0.465065	0.0105546	Mg
SEF 73 - SXB 412	-0.0215897	1		-0.265272	0.222093	Mg
SEF 73 - TIO CANELA 75	-0.031416	1		-0.264219	0.201387	Mg
SEN 56 - SXB 412	0.205666	0.1881		-0.0380171	0.449348	Mg
SEN 56 - TIO CANELA 75	0.195839	0.192		-0.0369635	0.428642	Mg
SXB 412 - TIO CANELA 75	-0.00982623	1		-0.248625	0.228972	Mg
BFS 35 - BFS 81	0.0653607	1		-0.274749	0.405471	P
BFS 35 - CARIOCA	0.121885	0.9904		-0.225869	0.469639	P
BFS 35 - DOR 390	0.0104001	1		-0.337354	0.358154	P
BFS 35 - NCB 226	0.201092	0.7124		-0.139018	0.541202	P
BFS 35 - RCB 593	0.0719984	0.9999		-0.268112	0.412109	P
BFS 35 - SEF 60	0.0526352	1		-0.287475	0.392745	P
BFS 35 - SEF 71	0.0609846	1		-0.279126	0.401095	P
BFS 35 - SEF 73	0.195422	0.7736		-0.152332	0.543176	P
BFS 35 - SEN 56	-0.0490004	1		-0.396754	0.298754	P
BFS 35 - SXB 412	0.216802	0.6756		-0.139909	0.573512	P
BFS 35 - TIO CANELA 75	0.186383	0.8006		-0.153727	0.526493	P
BFS 81 - CARIOCA	0.056524	1		-0.29123	0.404278	P
BFS 81 - DOR 390	-0.0549606	1		-0.402715	0.292793	P
BFS 81 - NCB 226	0.135731	0.9736		-0.204379	0.475841	P
BFS 81 - RCB 593	0.00663772	1		-0.333472	0.346748	P
BFS 81 - SEF 60	-0.0127254	1		-0.352836	0.327385	P
BFS 81 - SEF 71	-0.00437603	1		-0.344486	0.335734	P
BFS 81 - SEF 73	0.130061	0.9839		-0.217693	0.477815	P
BFS 81 - SEN 56	-0.114361	0.9944		-0.462115	0.233393	P
BFS 81 - SXB 412	0.151441	0.9585		-0.205269	0.508152	P
BFS 81 - TIO CANELA 75	0.121022	0.9892		-0.219088	0.461133	P
CARIOCA - DOR 390	-0.111485	0.9962		-0.466718	0.243749	P
CARIOCA - NCB 226	0.0792071	0.9998		-0.268547	0.426961	P
CARIOCA - RCB 593	-0.0498863	1		-0.39764	0.297868	P
CARIOCA - SEF 60	-0.0692494	0.9999		-0.417003	0.278505	P
CARIOCA - SEF 71	-0.0609	1		-0.408654	0.286854	P
CARIOCA - SEF 73	0.0735372	0.9999		-0.281696	0.428771	P
CARIOCA - SEN 56	-0.170885	0.9049		-0.526119	0.184348	P
CARIOCA - SXB 412	0.0949172	0.9993		-0.269089	0.458923	P
CARIOCA - TIO CANELA 75	0.0644984	1		-0.283256	0.412253	P
DOR 390 - NCB 226	0.190692	0.7999		-0.157062	0.538446	P
DOR 390 - RCB 593	0.0615983	1		-0.286156	0.409352	P
DOR 390 - SEF 60	0.0422351	1		-0.305519	0.389989	P
DOR 390 - SEF 71	0.0505845	1		-0.297169	0.398339	P
DOR 390 - SEF 73	0.185022	0.8482		-0.170212	0.540255	P
DOR 390 - SEN 56	-0.0594005	1		-0.414634	0.295833	P
DOR 390 - SXB 412	0.206402	0.7635		-0.157604	0.570408	P
DOR 390 - TIO CANELA 75	0.175983	0.8711		-0.171771	0.523737	P
NCB 226 - RCB 593	-0.129093	0.9819		-0.469204	0.211017	P
NCB 226 - SEF 60	-0.148457	0.9497		-0.488567	0.191654	P
NCB 226 - SEF 71	-0.140107	0.9666		-0.480217	0.200003	P
NCB 226 - SEF 73	-0.00566989	1		-0.353424	0.342084	P
NCB 226 - SEN 56	-0.250092	0.4166		-0.597846	0.0976618	P
NCB 226 - SXB 412	0.0157101	1		-0.341	0.372421	P
NCB 226 - TIO CANELA 75	-0.0147087	1		-0.354819	0.325402	P
RCB 593 - SEF 60	-0.0193632	1		-0.359473	0.320747	P
RCB 593 - SEF 71	-0.0110137	1		-0.351124	0.329096	P
RCB 593 - SEF 73	0.123424	0.9894		-0.224331	0.471178	P
RCB 593 - SEN 56	-0.120999	0.991		-0.468753	0.226755	P
RCB 593 - SXB 412	0.144804	0.97		-0.211907	0.501514	P
RCB 593 - TIO CANELA 75	0.114385	0.9932		-0.225725	0.454495	P
SEF 60 - SEF 71	0.00834941	1		-0.331761	0.34846	P
SEF 60 - SEF 73	0.142787	0.9674		-0.204967	0.490541	P
SEF 60 - SEN 56	-0.101636	0.998		-0.44939	0.246118	P
SEF 60 - SXB 412	0.164167	0.9282		-0.192544	0.520877	P
SEF 60 - TIO CANELA 75	0.133748	0.9763		-0.206362	0.473858	P
SEF 71 - SEF 73	0.134437	0.9792		-0.213317	0.482191	P
SEF 71 - SEN 56	-0.109985	0.996		-0.457739	0.237769	P
SEF 71 - SXB 412	0.155817	0.9494		-0.200893	0.512528	P
SEF 71 - TIO CANELA 75	0.125398	0.9856		-0.214712	0.465509	P
SEF 73 - SEN 56	-0.244422	0.4875		-0.599656	0.110811	P
SEF 73 - SXB 412	0.02138	1		-0.342626	0.385386	P
SEF 73 - TIO CANELA 75	-0.00903879	1		-0.356793	0.338715	P
SEN 56 - SXB 412	0.265802	0.3924		-0.0982037	0.629808	P
SEN 56 - TIO CANELA 75	0.235384	0.5137		-0.11237	0.583138	P
SXB 412 - TIO CANELA 75	-0.0304188	1		-0.387129	0.326292	P
BFS 35 - BFS 81	0.00926811	1		-0.245426	0.263962	S
BFS 35 - CARIOCA	0.0110223	1		-0.249396	0.271441	S
BFS 35 - DOR 390	0.0293891	1		-0.231029	0.289808	S
BFS 35 - NCB 226	0.0910788	0.9887		-0.163615	0.345773	S
BFS 35 - RCB 593	0.0879113	0.9916		-0.166783	0.342606	S
BFS 35 - SEF 60	0.0646791	0.9994		-0.190015	0.319373	S
BFS 35 - SEF 71	-0.0275278	1		-0.282222	0.227166	S
BFS 35 - SEF 73	0.117921	0.9355		-0.142498	0.378339	S
BFS 35 - SEN 56	-0.0545977	0.9999		-0.315016	0.205821	S
BFS 35 - SXB 412	0.1958	0.3864		-0.0713252	0.462926	S
BFS 35 - TIO CANELA 75	0.114957	0.9369		-0.139737	0.369651	S
BFS 81 - CARIOCA	0.00175417	1		-0.258664	0.262173	S
BFS 81 - DOR 390	0.020121	1		-0.240297	0.280539	S
BFS 81 - NCB 226	0.0818106	0.9954		-0.172884	0.336505	S
BFS 81 - RCB 593	0.0786432	0.9967		-0.176051	0.333337	S
BFS 81 - SEF 60	0.055411	0.9999		-0.199283	0.310105	S
BFS 81 - SEF 71	-0.0367959	1		-0.29149	0.217898	S
BFS 81 - SEF 73	0.108653	0.9634		-0.151766	0.369071	S
BFS 81 - SEN 56	-0.0638658	0.9996		-0.324284	0.196553	S
BFS 81 - SXB 412	0.186532	0.4638		-0.0805933	0.453658	S
BFS 81 - TIO CANELA 75	0.105689	0.9648		-0.149005	0.360383	S
CARIOCA - DOR 390	0.0183669	1		-0.247653	0.284386	S
CARIOCA - NCB 226	0.0800565	0.9969		-0.180362	0.340475	S
CARIOCA - RCB 593	0.076889	0.9978		-0.183529	0.337307	S
CARIOCA - SEF 60	0.0536569	0.9999		-0.206762	0.314075	S
CARIOCA - SEF 71	-0.0385501	1		-0.298968	0.221868	S
CARIOCA - SEF 73	0.106899	0.9722		-0.159121	0.372918	S
CARIOCA - SEN 56	-0.06562	0.9996		-0.331639	0.2004	S
CARIOCA - SXB 412	0.184778	0.5113		-0.0878107	0.457367	S
CARIOCA - TIO CANELA 75	0.103935	0.9735		-0.156484	0.364353	S
DOR 390 - NCB 226	0.0616896	0.9997		-0.198729	0.322108	S
DOR 390 - RCB 593	0.0585222	0.9998		-0.201896	0.318941	S
DOR 390 - SEF 60	0.03529	1		-0.225128	0.295708	S
DOR 390 - SEF 71	-0.0569169	0.9999		-0.317335	0.203502	S
DOR 390 - SEF 73	0.0885317	0.9938		-0.177488	0.354551	S
DOR 390 - SEN 56	-0.0839869	0.996		-0.350006	0.182033	S
DOR 390 - SXB 412	0.166411	0.6694		-0.106178	0.439	S
DOR 390 - TIO CANELA 75	0.085568	0.9944		-0.17485	0.345986	S
NCB 226 - RCB 593	-0.00316745	1		-0.257862	0.251527	S
NCB 226 - SEF 60	-0.0263996	1		-0.281094	0.228295	S
NCB 226 - SEF 71	-0.118607	0.9225		-0.373301	0.136088	S
NCB 226 - SEF 73	0.0268421	1		-0.233576	0.28726	S
NCB 226 - SEN 56	-0.145676	0.7787		-0.406095	0.114742	S
NCB 226 - SXB 412	0.104722	0.9769		-0.162404	0.371847	S
NCB 226 - TIO CANELA 75	0.0238784	1		-0.230816	0.278573	S
RCB 593 - SEF 60	-0.0232322	1		-0.277926	0.231462	S
RCB 593 - SEF 71	-0.115439	0.9351		-0.370133	0.139255	S
RCB 593 - SEF 73	0.0300095	1		-0.230409	0.290428	S
RCB 593 - SEN 56	-0.142509	0.802		-0.402927	0.117909	S
RCB 593 - SXB 412	0.107889	0.9711		-0.159237	0.375015	S
RCB 593 - TIO CANELA 75	0.0270458	1		-0.227648	0.28174	S
SEF 60 - SEF 71	-0.0922069	0.9876		-0.346901	0.162487	S
SEF 60 - SEF 73	0.0532417	0.9999		-0.207177	0.31366	S
SEF 60 - SEN 56	-0.119277	0.9304		-0.379695	0.141142	S
SEF 60 - SXB 412	0.131121	0.8924		-0.136004	0.398247	S
SEF 60 - TIO CANELA 75	0.050278	1		-0.204416	0.304972	S
SEF 71 - SEF 73	0.145449	0.7804		-0.11497	0.405867	S
SEF 71 - SEN 56	-0.0270699	1		-0.287488	0.233348	S
SEF 71 - SXB 412	0.223328	0.1993		-0.0437974	0.490454	S
SEF 71 - TIO CANELA 75	0.142485	0.7786		-0.112209	0.397179	S
SEF 73 - SEN 56	-0.172519	0.5807		-0.438538	0.0935009	S
SEF 73 - SXB 412	0.0778795	0.9984		-0.194709	0.350468	S
SEF 73 - TIO CANELA 75	-0.00296369	1		-0.263382	0.257455	S
SEN 56 - SXB 412	0.250398	0.1041		-0.0221908	0.522987	S
SEN 56 - TIO CANELA 75	0.169555	0.5746		-0.0908636	0.429973	S
SXB 412 - TIO CANELA 75	-0.0808432	0.9973		-0.347969	0.186282	S
BFS 35 - BFS 81	-8.25955e-05	1		-0.046594	0.0464288	Zn
BFS 35 - CARIOCA	-0.0152234	0.9899		-0.0584474	0.0280006	Zn
BFS 35 - DOR 390	-0.00554106	1		-0.0487651	0.0376829	Zn
BFS 35 - NCB 226	-0.00304695	1		-0.0455059	0.039412	Zn
BFS 35 - RCB 593	-0.00189281	1		-0.0443517	0.0405661	Zn
BFS 35 - SEF 60	-0.00473032	1		-0.0471892	0.0377286	Zn
BFS 35 - SEF 71	-0.0090952	0.9999		-0.0515541	0.0333637	Zn
BFS 35 - SEF 73	-0.0243832	0.7676		-0.0676072	0.0188408	Zn
BFS 35 - SEN 56	-0.0215891	0.8794		-0.0648131	0.0216349	Zn
BFS 35 - SXB 412	-0.00267526	1		-0.0467999	0.0414494	Zn
BFS 35 - TIO CANELA 75	-0.00216867	1		-0.0446276	0.0402902	Zn
BFS 81 - CARIOCA	-0.0151408	0.9903		-0.0583648	0.0280832	Zn
BFS 81 - DOR 390	-0.00545847	1		-0.0486825	0.0377655	Zn
BFS 81 - NCB 226	-0.00296436	1		-0.0454233	0.0394946	Zn
BFS 81 - RCB 593	-0.00181022	1		-0.0442691	0.0406487	Zn
BFS 81 - SEF 60	-0.00464773	1		-0.0471066	0.0378112	Zn
BFS 81 - SEF 71	-0.00901261	0.9999		-0.0514715	0.0334463	Zn
BFS 81 - SEF 73	-0.0243006	0.7715		-0.0675246	0.0189234	Zn
BFS 81 - SEN 56	-0.0215065	0.8821		-0.0647305	0.0217175	Zn
BFS 81 - SXB 412	-0.00259266	1		-0.0467173	0.0415319	Zn
BFS 81 - TIO CANELA 75	-0.00208608	1		-0.044545	0.0403728	Zn
CARIOCA - DOR 390	0.00968235	0.9996		-0.0299827	0.0493474	Zn
CARIOCA - NCB 226	0.0121765	0.9962		-0.0266535	0.0510064	Zn
CARIOCA - RCB 593	0.0133306	0.9918		-0.0254993	0.0521605	Zn
CARIOCA - SEF 60	0.0104931	0.999		-0.0283368	0.049323	Zn
CARIOCA - SEF 71	0.00612821	1		-0.0327017	0.0449581	Zn
CARIOCA - SEF 73	-0.00915975	0.9998		-0.0488248	0.0305053	Zn
CARIOCA - SEN 56	-0.00636565	1		-0.0460307	0.0332994	Zn
CARIOCA - SXB 412	0.0125482	0.9967		-0.0280964	0.0531928	Zn
CARIOCA - TIO CANELA 75	0.0130547	0.9931		-0.0257752	0.0518847	Zn
DOR 390 - NCB 226	0.00249411	1		-0.0363358	0.041324	Zn
DOR 390 - RCB 593	0.00364825	1		-0.0351817	0.0424782	Zn
DOR 390 - SEF 60	0.000810739	1		-0.0380192	0.0396407	Zn
DOR 390 - SEF 71	-0.00355414	1		-0.0423841	0.0352758	Zn
DOR 390 - SEF 73	-0.0188421	0.9111		-0.0585072	0.020823	Zn
DOR 390 - SEN 56	-0.016048	0.9703		-0.0557131	0.0236171	Zn
DOR 390 - SXB 412	0.00286581	1		-0.0377788	0.0435104	Zn
DOR 390 - TIO CANELA 75	0.00337239	1		-0.0354575	0.0422023	Zn
NCB 226 - RCB 593	0.00115414	1		-0.0368223	0.0391306	Zn
NCB 226 - SEF 60	-0.00168337	1		-0.0396598	0.036293	Zn
NCB 226 - SEF 71	-0.00604825	1		-0.0440247	0.0319282	Zn
NCB 226 - SEF 73	-0.0213362	0.7962		-0.0601661	0.0174937	Zn
NCB 226 - SEN 56	-0.0185421	0.9081		-0.057372	0.0202878	Zn
NCB 226 - SXB 412	0.000371696	1		-0.0394583	0.0402017	Zn
NCB 226 - TIO CANELA 75	0.00087828	1		-0.0370981	0.0388547	Zn
RCB 593 - SEF 60	-0.00283751	1		-0.0408139	0.0351389	Zn
RCB 593 - SEF 71	-0.00720239	1		-0.0451788	0.030774	Zn
RCB 593 - SEF 73	-0.0224904	0.7365		-0.0613203	0.0163396	Zn
RCB 593 - SEN 56	-0.0196963	0.8681		-0.0585262	0.0191337	Zn
RCB 593 - SXB 412	-0.000782444	1		-0.0406124	0.0390476	Zn
RCB 593 - TIO CANELA 75	-0.00027586	1		-0.0382523	0.0377005	Zn
SEF 60 - SEF 71	-0.00436488	1		-0.0423413	0.0336115	Zn
SEF 60 - SEF 73	-0.0196528	0.8697		-0.0584828	0.0191771	Zn
SEF 60 - SEN 56	-0.0168587	0.9509		-0.0556887	0.0219712	Zn
SEF 60 - SXB 412	0.00205507	1		-0.0377749	0.0418851	Zn
SEF 60 - TIO CANELA 75	0.00256165	1		-0.0354148	0.0405381	Zn
SEF 71 - SEF 73	-0.015288	0.9757		-0.0541179	0.023542	Zn
SEF 71 - SEN 56	-0.0124939	0.9952		-0.0513238	0.0263361	Zn
SEF 71 - SXB 412	0.00641995	1		-0.03341	0.0462499	Zn
SEF 71 - TIO CANELA 75	0.00692653	1		-0.0310499	0.0449029	Zn
SEF 73 - SEN 56	0.0027941	1		-0.036871	0.0424592	Zn
SEF 73 - SXB 412	0.0217079	0.8243		-0.0189367	0.0623525	Zn
SEF 73 - TIO CANELA 75	0.0222145	0.7513		-0.0166154	0.0610444	Zn
SEN 56 - SXB 412	0.0189138	0.922		-0.0217308	0.0595584	Zn
SEN 56 - TIO CANELA 75	0.0194204	0.8785		-0.0194095	0.0582503	Zn
SXB 412 - TIO CANELA 75	0.000506584	1		-0.0393234	0.0403366	Zn
BFS 35 - BFS 81	0.376119	0.5227		-0.182797	0.935036	N
BFS 35 - CARIOCA	-0.00418466	1		-0.563101	0.554732	N
BFS 35 - DOR 390	-0.160952	0.9982		-0.719868	0.397965	N
BFS 35 - NCB 226	0.512276	0.1059		-0.0466404	1.07119	N
BFS 35 - RCB 593	0.0386347	1		-0.507996	0.585266	N
BFS 35 - SEF 60	0.0614052	1		-0.485226	0.608036	N
BFS 35 - SEF 71	-0.107951	1		-0.666867	0.450965	N
BFS 35 - SEF 73	-0.494856	0.1163		-1.04149	0.051775	N
BFS 35 - SEN 56	0.135149	0.9996		-0.411482	0.68178	N
BFS 35 - SXB 412	0.132561	0.9998		-0.44075	0.705873	N
BFS 35 - TIO CANELA 75	-0.370609	0.5108		-0.91724	0.176022	N
BFS 81 - CARIOCA	-0.380304	0.5389		-0.951241	0.190633	N
BFS 81 - DOR 390	-0.537071	0.0861	.	-1.10801	0.0338663	N
BFS 81 - NCB 226	0.136156	0.9997		-0.434781	0.707094	N
BFS 81 - RCB 593	-0.337485	0.6843		-0.896401	0.221431	N
BFS 81 - SEF 60	-0.314714	0.7712		-0.87363	0.244202	N
BFS 81 - SEF 71	-0.484071	0.1827		-1.05501	0.0868666	N
BFS 81 - SEF 73	-0.870975	0.0001	***	-1.42989	-0.312059	N
BFS 81 - SEN 56	-0.24097	0.9537		-0.799887	0.317946	N
BFS 81 - SXB 412	-0.243558	0.9639		-0.828595	0.341479	N
BFS 81 - TIO CANELA 75	-0.746729	0.0011	**	-1.30564	-0.187813	N
CARIOCA - DOR 390	-0.156767	0.9989		-0.727704	0.41417	N
CARIOCA - NCB 226	0.51646	0.117		-0.0544768	1.0874	N
CARIOCA - RCB 593	0.0428194	1		-0.516097	0.601736	N
CARIOCA - SEF 60	0.0655899	1		-0.493326	0.624506	N
CARIOCA - SEF 71	-0.103767	1		-0.674704	0.467171	N
CARIOCA - SEF 73	-0.490671	0.1452		-1.04959	0.068245	N
CARIOCA - SEN 56	0.139334	0.9995		-0.419582	0.69825	N
CARIOCA - SXB 412	0.136746	0.9997		-0.448291	0.721783	N
CARIOCA - TIO CANELA 75	-0.366425	0.5637		-0.925341	0.192492	N
DOR 390 - NCB 226	0.673227	0.0075	**	0.10229	1.24416	N
DOR 390 - RCB 593	0.199586	0.9888		-0.35933	0.758502	N
DOR 390 - SEF 60	0.222357	0.9741		-0.33656	0.781273	N
DOR 390 - SEF 71	0.0530003	1		-0.517937	0.623938	N
DOR 390 - SEF 73	-0.333904	0.6986		-0.892821	0.225012	N
DOR 390 - SEN 56	0.296101	0.8331		-0.262816	0.855017	N
DOR 390 - SXB 412	0.293513	0.8773		-0.291524	0.87855	N
DOR 390 - TIO CANELA 75	-0.209658	0.9835		-0.768574	0.349258	N
NCB 226 - RCB 593	-0.473641	0.1833		-1.03256	0.0852751	N
NCB 226 - SEF 60	-0.450871	0.2449		-1.00979	0.108046	N
NCB 226 - SEF 71	-0.620227	0.021	*	-1.19116	-0.0492898	N
NCB 226 - SEF 73	-1.00713	0	***	-1.56605	-0.448215	N
NCB 226 - SEN 56	-0.377127	0.5185		-0.936043	0.18179	N
NCB 226 - SXB 412	-0.379714	0.5793		-0.964751	0.205322	N
NCB 226 - TIO CANELA 75	-0.882885	0	***	-1.4418	-0.323969	N
RCB 593 - SEF 60	0.0227705	1		-0.52386	0.569401	N
RCB 593 - SEF 71	-0.146586	0.9993		-0.705502	0.41233	N
RCB 593 - SEF 73	-0.533491	0.0626	.	-1.08012	0.0131403	N
RCB 593 - SEN 56	0.0965144	1		-0.450116	0.643145	N
RCB 593 - SXB 412	0.0939267	1		-0.479385	0.667238	N
RCB 593 - TIO CANELA 75	-0.409244	0.3532		-0.955875	0.137387	N
SEF 60 - SEF 71	-0.169356	0.9972		-0.728273	0.38956	N
SEF 60 - SEF 73	-0.556261	0.0422	*	-1.10289	-0.00963018	N
SEF 60 - SEN 56	0.073744	1		-0.472887	0.620375	N
SEF 60 - SXB 412	0.0711562	1		-0.502155	0.644467	N
SEF 60 - TIO CANELA 75	-0.432014	0.273		-0.978645	0.114616	N
SEF 71 - SEF 73	-0.386905	0.4775		-0.945821	0.172012	N
SEF 71 - SEN 56	0.2431	0.9508		-0.315816	0.802017	N
SEF 71 - SXB 412	0.240513	0.967		-0.344524	0.825549	N
SEF 71 - TIO CANELA 75	-0.262658	0.9178		-0.821574	0.296258	N
SEF 73 - SEN 56	0.630005	0.0102	*	0.0833741	1.17664	N
SEF 73 - SXB 412	0.627417	0.0193	*	0.054106	1.20073	N
SEF 73 - TIO CANELA 75	0.124247	0.9998		-0.422384	0.670877	N
SEN 56 - SXB 412	-0.00258776	1		-0.575899	0.570723	N
SEN 56 - TIO CANELA 75	-0.505758	0.0984	.	-1.05239	0.0408724	N
SXB 412 - TIO CANELA 75	-0.503171	0.1454		-1.07648	0.0701406	N
